1 **Inhalable textile microplastic fibers impair airway epithelial growth**

2  
3 **Short title: Textile microplastic fibers impair organoid growth**

4  
5  
6 F. van Dijk<sup>1,2</sup>, S. Song<sup>1,3</sup>, G.W.A van Eck<sup>1</sup>, X. Wu<sup>1,2</sup>, I.S.T. Bos<sup>1</sup>, D.H.A. Boom<sup>4</sup>, I.M.  
7 Kooter<sup>4</sup>, D.C.J. Spierings<sup>5</sup>, R. Wardenaar<sup>5</sup>, M. Cole<sup>6</sup>, A. Salvati<sup>7</sup>, R. Gosens<sup>1,2</sup>, B.N.  
8 Melgert<sup>1,2,\*</sup>

9  
10 <sup>1</sup>Groningen Research Institute for Pharmacy, Department of Molecular Pharmacology,  
11 University of Groningen, Groningen, the Netherlands.

12 <sup>2</sup>Groningen Research Institute for Asthma and COPD, University Medical Center Groningen,  
13 University of Groningen, Groningen, the Netherlands.

14 <sup>3</sup>Groningen Research Institute for Pharmacy, Department of Chemical and Pharmaceutical  
15 Biology, University of Groningen, Groningen, the Netherlands.

16 <sup>4</sup>The Netherlands Organization for Applied Scientific Research, TNO, Utrecht, the  
17 Netherlands.

18 <sup>5</sup>European Research Institute for the Biology of Ageing, University Medical Center  
19 Groningen, University of Groningen, Groningen, the Netherlands.

20 <sup>6</sup>Plymouth Marine Laboratory, Plymouth, United Kingdom.

21 <sup>7</sup>Groningen Research Institute for Pharmacy, Department of Nanomedicine & Drug  
22 Targeting, University of Groningen, Groningen, the Netherlands.

23  
24 \* Corresponding author:

25 Prof Dr Barbro N. Melgert

26 Groningen Research Institute of Pharmacy

27 Department of Molecular Pharmacology

28 University of Groningen

29 A. Deusinglaan 1

30 9713 AV Groningen

31 the Netherlands

32 b.n.melgert@rug.nl

33 **Abstract**

34 Synthetic textiles shed fibers that accumulate indoors and this results in continuous  
35 exposure when indoors. High exposure to microplastic fibers in nylon flock workers has  
36 been linked to the development of airway and interstitial lung disease, but the exact health  
37 effects of microplastic fibers on the lungs are unknown. Here we determined effects of  
38 polyester and nylon textile microplastic fibers on airway and alveolar epithelial cells using  
39 human and murine lung organoids. We observed that particularly nylon microfibers had a  
40 negative impact on the growth and development of airway organoids. We demonstrated that  
41 this effect was mediated by components leaking from nylon. Moreover, our data suggested  
42 that microplastic textile fibers may especially harm the developing airways or airways  
43 undergoing repair. Our results call for a need to assess exposure and inhalation levels in  
44 indoor environments to accurately determine the actual risk of these fibers to human health.

45  
46  
47 **Teaser**

48 Airborne fibers shed from synthetic textiles, in particular nylon, can inhibit repair of the cells  
49 coating the airways

50

## 51 **Introduction**

52 Plastic pollution is a pressing global concern and microplastics are a significant part of this  
53 problem (1). High amounts of microplastics have been found in marine environments, air,  
54 soils, plants, and animals, which illustrates how omnipresent this relatively recent pollution  
55 actually is (2). Microplastic pollution derives from personal care products, synthetic clothes,  
56 and degradation of macroplastics (3, 4). Synthetic textile fibers are one of the most  
57 prevalent types of microplastic waste observed, with an annual production of 60 million  
58 metric tons, which equals 16% of the world's plastic pollution (1). These fibers are typically  
59 composed of nylon or polyester and are released into the environment by wear and tear and  
60 during washing and drying of garments (4-6).

61 The ubiquitous nature of microplastics in the environment inevitably leads to human  
62 exposure, which can occur through two main routes (7, 8). Firstly, through ingestion of  
63 contaminated food and water and secondly via inhalation. Microplastics have been reported  
64 both in indoor and outdoor air, with levels indoors being 2-5 times higher as compared to  
65 outdoors (9, 10). Whether or not microfibers can deposit in lung tissue largely depends on  
66 the aerodynamic diameter of the fibers (7, 11). Lung deposition is most efficiently achieved  
67 with aerodynamic diameters between 1-10  $\mu\text{m}$  (12), however, these sizes are difficult to  
68 quantify in environmental samples due to limitations of the analytical techniques (9, 13).  
69 Yet, plastic microfibers have been found in human lung tissue, suggesting inhalation does  
70 indeed take place (14). Furthermore, several studies from workers in synthetic textile, flock  
71 and (poly)vinyl chloride industries suggest that inhalation of such microfibers is harmful, as  
72 around 30% of factory workers developed work-related airway and interstitial lung disease  
73 (15-23). Moreover, exposure to particulate matter in air pollution, also containing  
74 microplastics (24-26), has been associated with higher risk of developing asthma and an  
75 increase in asthma symptoms in areas with higher levels of particulate matter air pollution  
76 (27-29).

77 Despite the potential capacity for microplastic fibers to contribute to respiratory diseases,  
78 the health effects are greatly understudied and information providing evidence of potential  
79 human health effects of inhaled microplastics is lacking (9, 30, 31). In the present study, we  
80 therefore explored whether textile microplastic fibers can cause damage to lung tissue. As  
81 epithelial cells are the first to come into contact with inhaled fibers, we investigated effects  
82 of polyester and nylon microfibers on lung epithelial proliferation, differentiation, and

83 repair processes. For this we used lung organoids that are grown from primary lung  
84 epithelial progenitor cells with support of a lung fibroblast cell line (32, 33). The epithelial  
85 progenitors can develop into organoids consisting of alveolar epithelial cells or organoids  
86 consisting of airway epithelial cells with help of growth factors produced by fibroblasts. We  
87 found that in particular nylon microfibers negatively impacted developing airway  
88 organoids, while developing alveolar organoids and already developed organoids of both  
89 types appeared to be less affected. This negative effect was caused by still unknown  
90 leachates from nylon that particularly inhibit differentiation of airway epithelial cells. We  
91 therefore call for assessment of exposure levels in indoor environments and actual lung  
92 deposition to accurately determine the risk of these fibers to human health.

93

## 94 Results

### 95 Characterization of reference microfibers

96 To produce reference textile fibers that resemble microplastics found in our indoor  
97 environments, we used a method previous described by us to reproducibly generate fibers of  
98 specific lengths (34). We particularly focused on polyester and nylon, because these are the  
99 most abundant types of microplastics indoors (9, 35-38). As we spend the majority of our  
00 time indoors, we may therefore be exposed most to these types of microplastics (39). Fibers  
01 are commonly defined as having a length to diameter ratio of 3:1 (40). The fibers we  
02 produced had a median size of 15x52  $\mu\text{m}$  for polyester and 12x31  $\mu\text{m}$  for nylon (Table S1).  
03 Using scanning electron microscopy (SEM) we found these fibers to be rod-shaped with a  
04 circular cross-section and had a smooth surface (Figure 1A and B). For our polyester fibers  
05 energy dispersive X-ray (EDX) analysis confirmed the presence of carbon and oxygen  
06 (Figure S1A). The recorded micro-Fourier transform infrared ( $\mu\text{FTIR}$ ) spectrum showed  
07 characteristic absorbance peaks of polyester (Figure S1B). The EDX spectrum for nylon  
08 confirmed the presence of carbon, nitrogen and oxygen (Figure S1C) and the  $\mu\text{FTIR}$   
09 spectrum showed characteristic nylon absorbance peaks (Figure S1D).

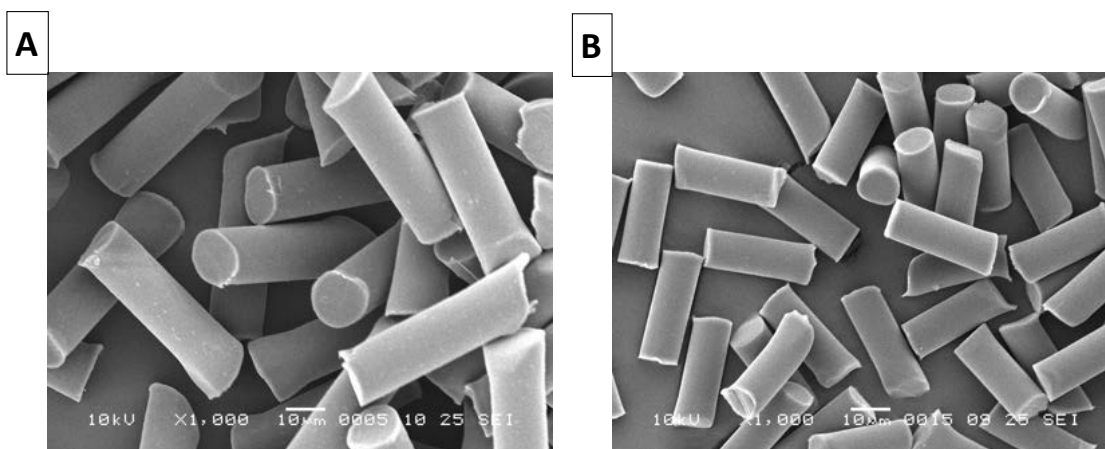

10  
11 **Figure 1. Morphology of reference microplastic fibers of standardized dimensions.**  
12 *Representative SEM micrographs of (A) polyester microfibers (15x52  $\mu\text{m}$ ) and (B) nylon*  
13 *microfibers (12x31  $\mu\text{m}$ ).*

14  
15

## 16 **Nylon microfibers inhibited growth of murine and human lung organoids**

17 Possible effects of microplastic fibers on lung epithelial proliferation, differentiation, and  
18 repair processes were assessed *in vitro* using both murine and a human lung organoids.  
19 Airways are lined with ciliated pseudostratified epithelium consisting of basal cells, ciliated  
20 cells, and secretory cells like goblet cells and club cells, while alveoli consist of alveolar  
21 epithelial cells type I and II (AECI and AECII). Basal cells and club cells have stem cell-  
22 like abilities and basal cells can give rise to all important epithelial cells lining the airways,  
23 while club cells can develop into ciliated cells, goblet cells, and AECII (41, 42). AECII can  
24 behave as alveolar stem cells and can proliferate and develop into AECI (43). The lung  
25 organoids we used in these studies self-assemble from the lung epithelial progenitor/stem  
26 cells isolated from adult lung tissue, i.e. basal cells, club cells and AECII. The growth of  
27 organoids from these progenitor cells is supported by proliferation and differentiation  
28 enhancers produced by epithelial cells themselves and fibroblasts also present in our 3D  
29 cultures (43).

30 We first assessed the effects of several doses of fibers on organoid growth ranging from  
31 2000-5000 fibers per well (Figure S2). The fibers were dispersed into liquid Matrigel at the  
32 same time as the isolated epithelial cells and fibroblasts were added, after which the  
33 Matrigel solidifies and epithelial progenitors start to form organoids. Based on these results  
34 we continued with 5000 polyester or 5000 nylon fibers per well, equivalent to 122  $\mu\text{g/ml}$   
35 polyester and 39  $\mu\text{g/ml}$  nylon, as this concentration had clear effects and was on the lower  
36 end of the spectrum of concentrations used in other studies (7).

37 Murine lung organoids develop into two distinct phenotypes, i.e. acetylated  $\alpha$ -tubulin-  
38 positive airway organoids (Figure 2A) and prosurfactant protein C-positive alveolar  
39 organoids (Figure 2B). We assessed the effects of the two types of fibers on these two  
40 structures separately. Exposure during 14 days to either polyester or nylon microfibers  
41 resulted in significantly fewer organoids (Figure 2C) compared to untreated controls (Figure  
42 2D and E). The effect of nylon on airway organoids was most profound of the two types of  
43 plastic and the two types of structures. Moreover, both airway and alveolar organoids were  
44 significantly smaller in size following nylon microfiber exposure as compared to untreated  
45 controls (Figure 2F and G).

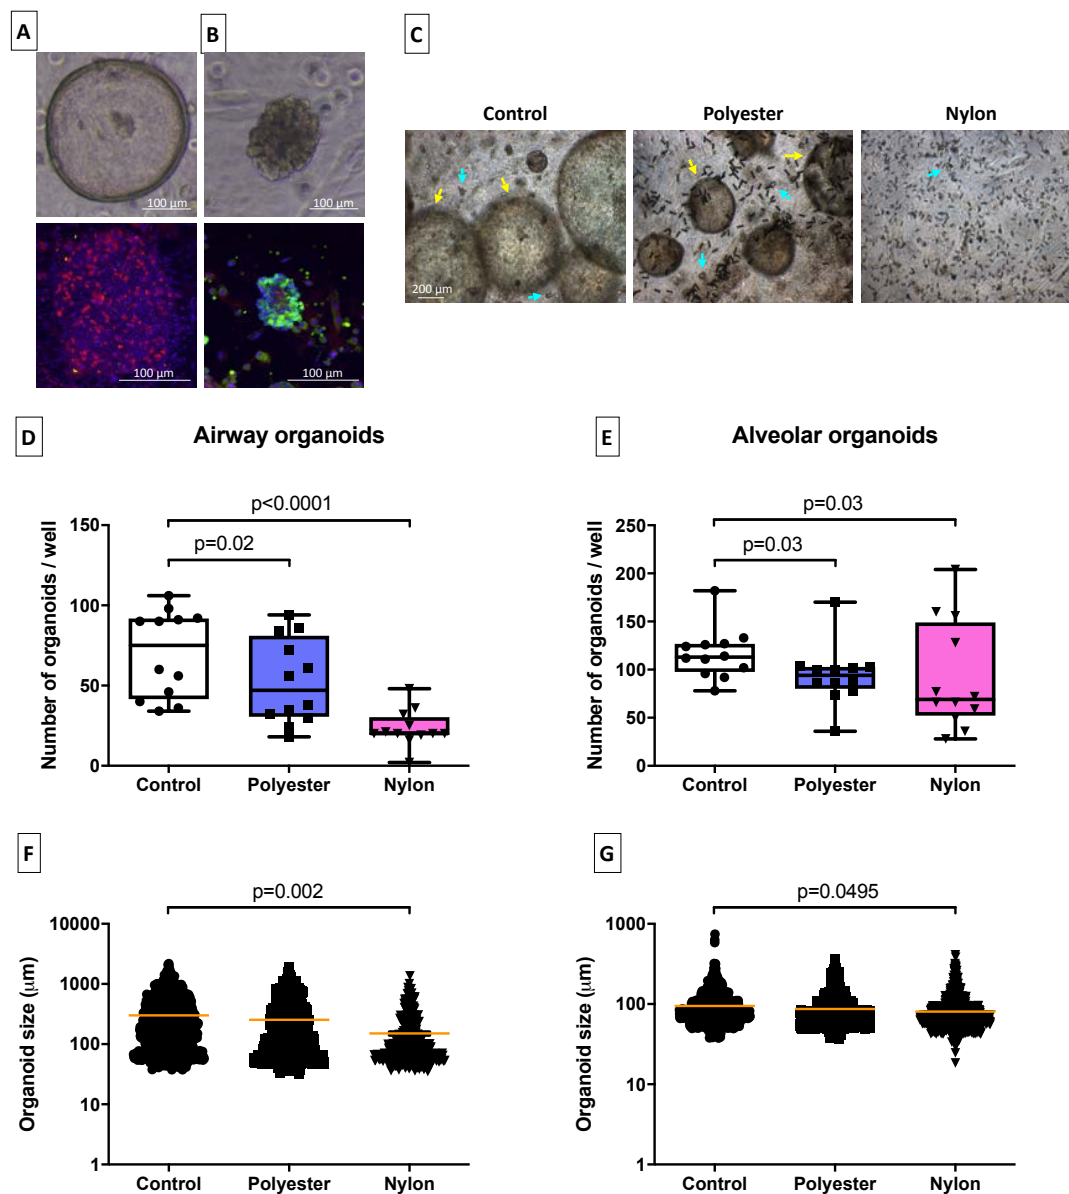

46  
 47 **Figure 2. Effects of microplastic fibers on growth of murine lung organoids.** Light  
 48 microscopy images and fluorescence photographs of (A) acetylated  $\alpha$ -tubulin-positive  
 49 airway organoids (red) and (B) prosurfactant protein C-positive alveolar organoids  
 50 (green). Nuclei were counterstained with DAPI (blue). (C) Representative light microscopy  
 51 images of the different treatment conditions. Yellow arrows in the light microscopy images  
 52 indicate airway organoids, whereas cyan arrows indicate alveolar organoids. (D and E)  
 53 Quantification of the numbers and (F and G) quantification of the sizes of airway and  
 54 alveolar lung organoids exposed for 14 days to no fibers, 5000 polyester, or 5000 nylon  
 55 fibers (equivalent to 122  $\mu\text{g/ml}$  polyester or 39  $\mu\text{g/ml}$  polyester,  $n=12$  independent  
 56 isolations). Groups were compared using a Friedman test with Dunn's correction for  
 57 multiple testing.  $P<0.05$  was considered significant.



58 Similar results were observed in human lung organoids, that mainly develop into alveolar  
59 organoids or mixed alveolar/airway organoids positive (Figure 3A). 14 day-exposure to  
60 nylon microfibers resulted in significantly fewer human lung organoids (Figure 3B and C),  
61 whereas the effects of polyester on organoid growth were less profound. The size of the  
62 organoids was not affected by the presence of nylon microfibers (Figure 3D).

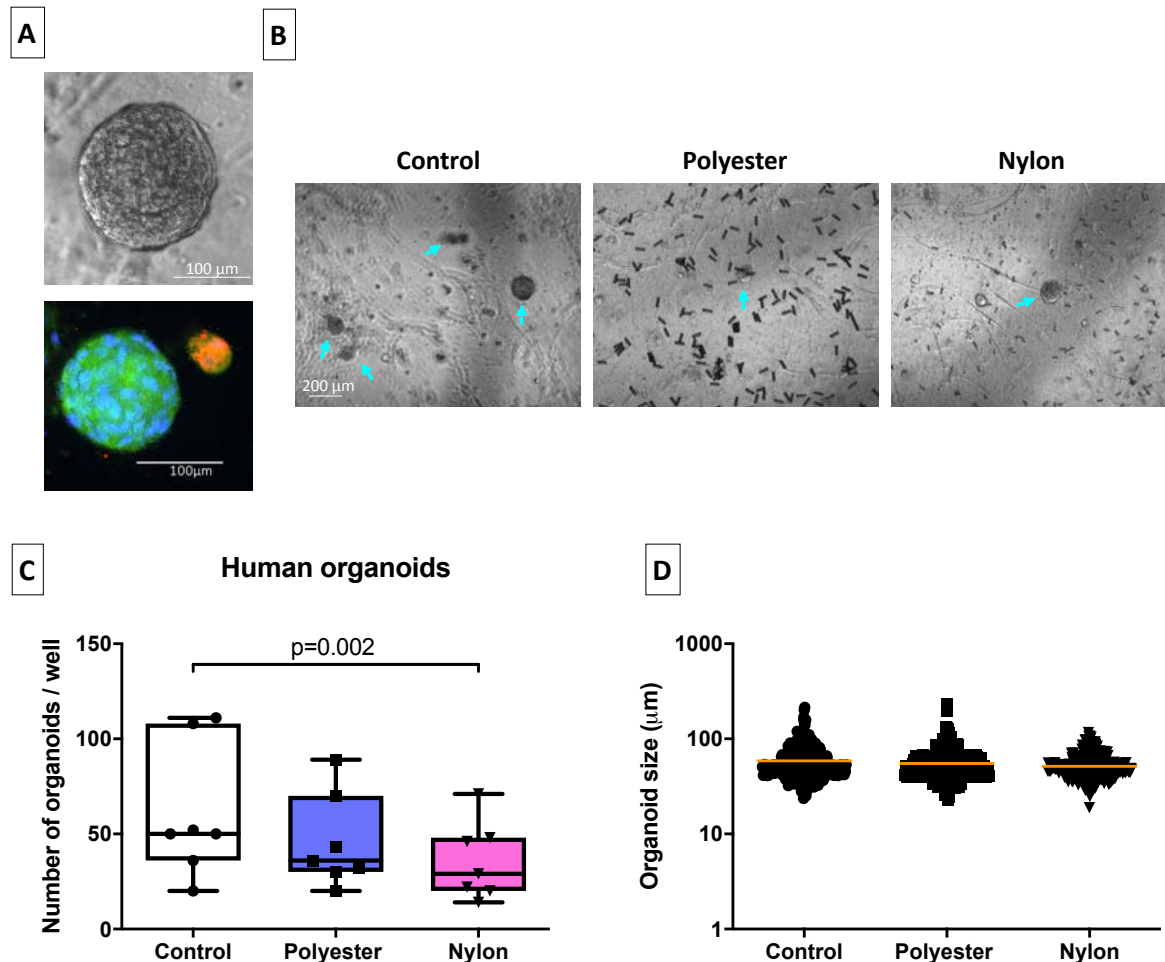

63 **Figure 3. Influence of microplastic fibers on growth of human lung organoids.** (A) The  
64 morphology of the alveolar prosurfactant protein C-positive organoids (green) and mixed  
65 acetylated  $\alpha$ -tubulin/prosurfactant protein C-positive organoids (orange) as shown by light  
66 and fluorescence microscopy. Nuclei were counterstained with DAPI (blue). (B)  
67 Representative light microscopy images of all treatment conditions. Cyan arrows indicate  
68 lung organoids. (C) Quantification of the numbers and (D) sizes of human lung organoids  
69 following 14-day exposure to either no microfibers, 5000 polyester, or 5000 nylon fibers  
70 (equivalent to 122  $\mu\text{g}/\text{ml}$  polyester or 39  $\mu\text{g}/\text{ml}$  polyester,  $n=7$  independent isolations).  
71 Groups were compared using a Friedman test with Dunn's correction for multiple testing.  
72  $P<0.05$  was considered significant.



### Environmental microplastic fibers impaired lung organoid growth as well

Having observed these effects after exposure to reference microfibers, we next performed similar experiments using environmentally relevant polyester and nylon fibers on murine lung organoids. These were made from white polyester and nylon fabrics purchased in a local fabric store and cut to sizes approximating the reference fibers. First, we characterized morphology and chemical composition of these fibers. For polyester, we observed a more heterogeneous size distribution as compared to the reference fibers, with fibers having a median size of  $17 \times 63 \mu\text{m}$  (Figure 4A, Table S2), but a comparable EDX and  $\mu\text{FTIR}$  spectrum (Figure S3A and B). The nylon fibers had a disk-shaped appearance but similar dimensions as the reference nylon fibers (median  $57 \times 20 \mu\text{m}$ , Table S2). The EDX analysis revealed the expected C, N and O peaks for nylon (Figure S3C) and the  $\mu\text{FTIR}$  spectrum showed characteristic nylon absorbance peaks (Figure S3D).

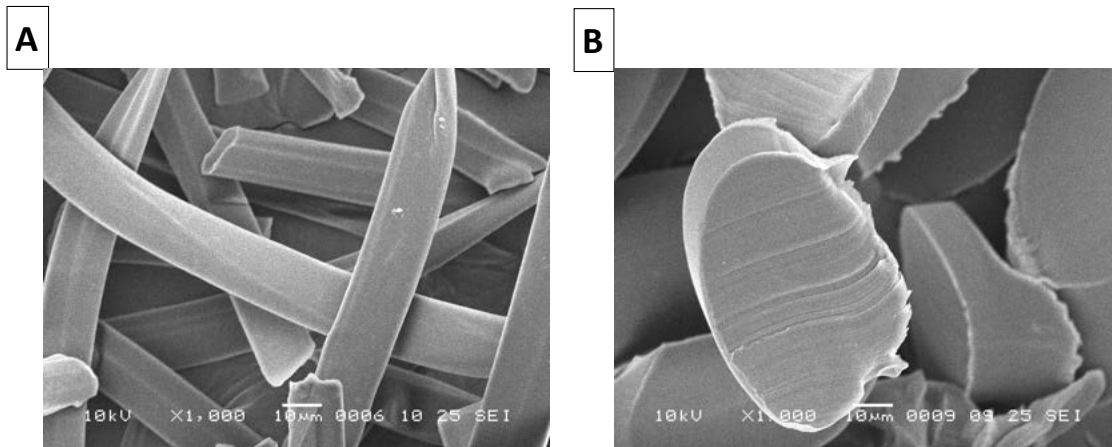

**Figure 4. Morphology of environmental microplastic fibers.** Representative SEM pictures of (A) polyester microfibrils ( $17 \times 63 \mu\text{m}$ ) and (B) nylon microfibrils ( $57 \times 20 \mu\text{m}$ ).

As observed with the reference fibers, exposure to environmental nylon microfibrils resulted in markedly fewer lung organoids (Figure 5A, B and C) as well as smaller organoids (Figure 5D and E).

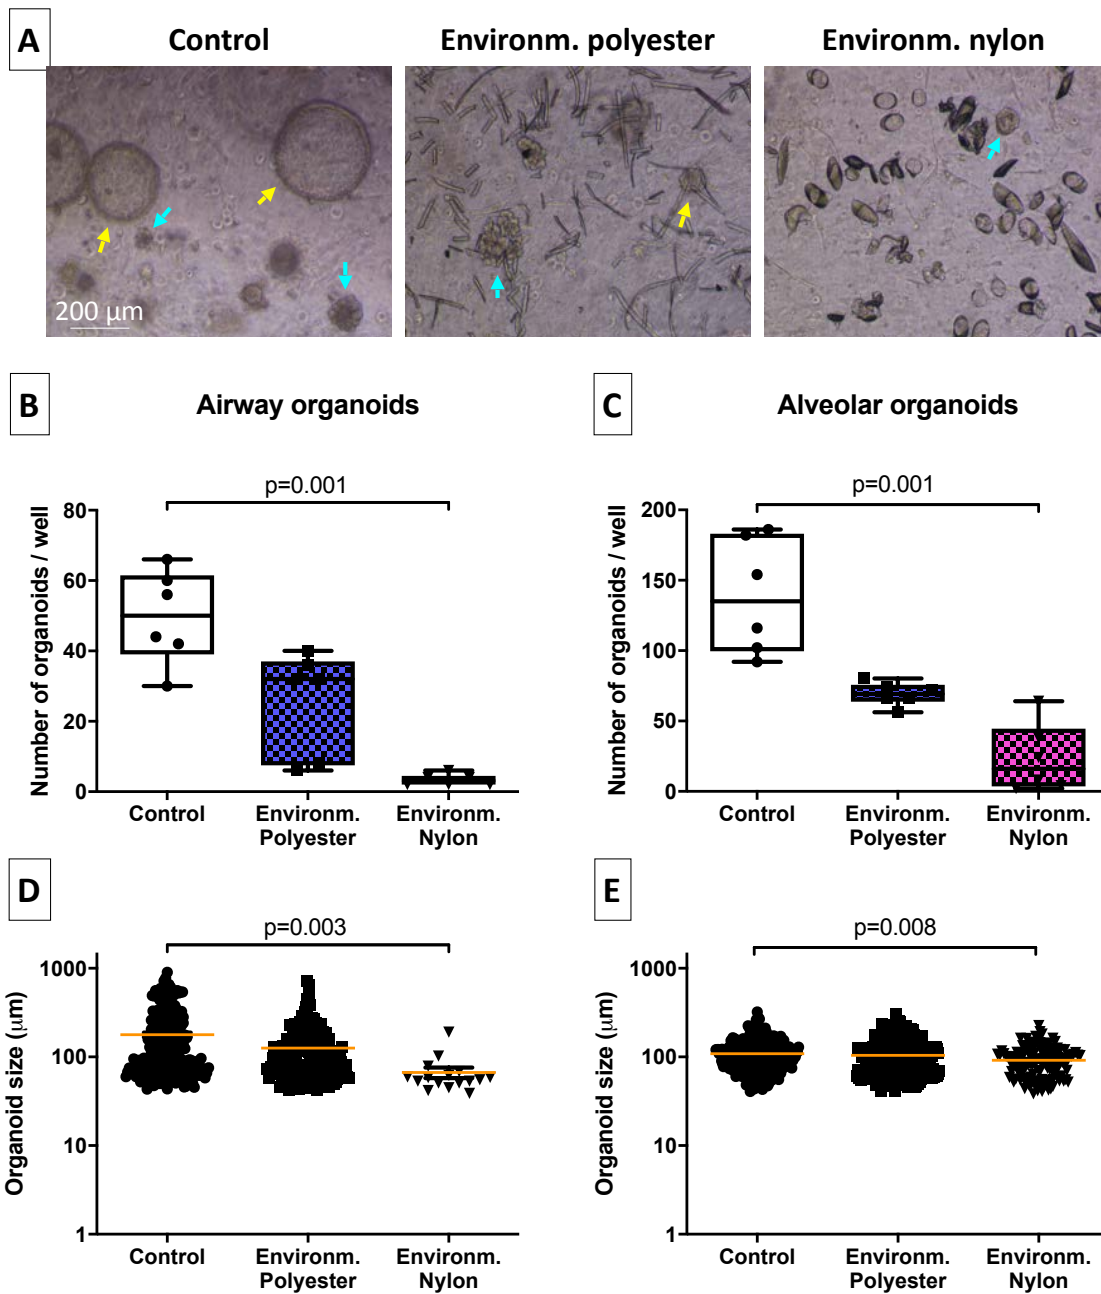

92  
93 **Figure 5: Effect of environmentally relevant textile fibers on growth of murine lung**  
94 **organoids.** (A) Representative light microscopy images of all treatment conditions. Yellow  
95 arrows in the light microscopy images indicate airway organoids, whereas cyan arrows  
96 indicate alveolar organoids. (B and C) Quantification of the numbers and (D and E) sizes  
97 of airway and alveolar organoids ( $n=6$  independent isolations) following 14-day exposure  
98 to either no microfibers, 5000 polyester or 5000 nylon microfibers (approximately  
99 equivalent to 189  $\mu\text{g}/\text{ml}$  polyester or 531  $\mu\text{g}/\text{ml}$  nylon). Groups were compared using a  
00 Friedman test with Dunn's correction for multiple testing.  $P<0.05$  was considered  
01 significant.

## 02 **Leaching nylon components caused a reduction in lung organoid growth**

03 Since organoid growth was most affected by nylon, both reference and environmentally  
04 relevant fibers, we investigated whether this inhibition was caused by the physical presence  
05 of fibers nearby the cells or by leaching components from these nylon fibers. Therefore, we  
06 added nylon reference microfibers either on top of the Matrigel after it had set, thereby  
07 preventing direct contact with the cells, or added leachate of these fibers to the medium  
08 surrounding the Matrigel for 14 days. Interestingly, even when excluding physical contact  
09 between the fibers and the cells or simply exposing the cells to medium with leachate, the  
10 same effects on airway organoids were observed as when the forming organoids were  
11 directly exposed to the fibers. We found significantly fewer airway organoids in the  
12 presence of nylon microfibers on top of the gel or their leachate (Figure 6A and B)  
13 compared to having the fibers inside the Matrigel. The number of alveolar organoids, on the  
14 other hand, was unaffected (fibers on top) or even induced (leachate, Figure 6A and C)  
15 compared to having the fibers inside the Matrigel. Additionally, the size of these airway  
16 organoids was smaller as compared to untreated control organoids (Figure 6D), while only  
17 slightly inhibiting the size of the alveolar organoids (Figure 6E). These data suggest that  
18 specifically airway epithelial growth is inhibited by components leaching from nylon  
19 microplastics.

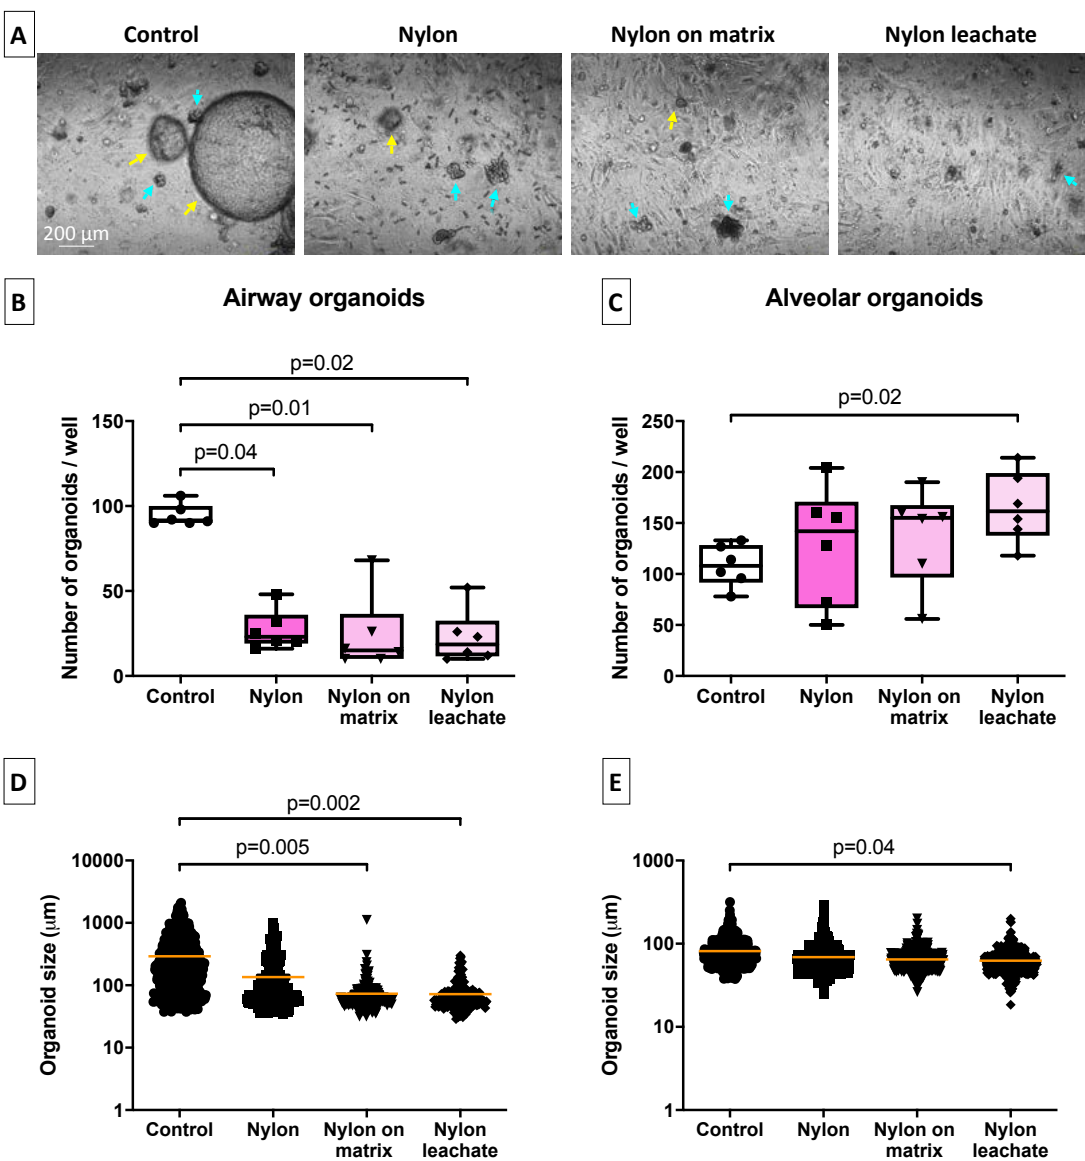

**Figure 6. Impact of nylon reference microfibers and their leaching components on growth of murine lung organoids.** (A) Representative light microscopy images of all treatment conditions. Yellow arrows in the light microscopy images indicate airway organoids, whereas cyan arrows indicate alveolar organoids. (B and C) Quantification of the numbers and (D and E) sizes of airway and alveolar organoids following either direct exposure to 5000 nylon microfibers or indirect exposure to nylon by adding 5000 microfibers (equivalent to 39  $\mu\text{g}/\text{ml}$  nylon) on top of the Matrigel or by adding nylon leachate to the culture medium ( $n=6$  independent isolations). Groups were compared using a Friedman test with Dunn's correction for multiple testing.  $P<0.05$  was considered significant.

32 The strong effects observed with the leachate suggested that some components and/or  
33 degradation products may leak and/or form during fiber ageing at 37C. Thus in order to  
34 determine the chemical identity of the components leaching from nylon reference  
35 microfibers we used mass spectrometry analysis. This revealed high concentrations of  
36 cyclic nylon oligomers (mono-, di- and trimers) in the leachate of nylon microfibers (Figure  
37 S4A), which are known to develop as by-products during the production of nylon (44).  
38 However, when exposing murine lung organoids to different concentrations of these  
39 isolated oligomers separately or in combination, we observed no effects on either number or  
40 size of organoids (Figure S4B-E showing the highest concentration that has been tested).  
41 These data suggest that other components in nylon leachate are causing the inhibitory  
42 effects on organoid growth. Recent work by Sait and Sørensen and colleagues showed that  
43 the most abundant chemicals leaching from nylon are bisphenol A and benzophenone-3 (45,  
44 46). However, we could not detect these in our leachate, suggesting that if they are present,  
45 they are so in minute quantities. Initial experiments incubating organoids with different  
46 concentrations of bisphenol A or benzophenone-3 did not show effects on organoid growth  
47 of either of them suggesting they are indeed not the culprits in our leachate (data not  
48 shown).

### 50 **Leaching nylon components mainly affected developing organoids**

51 As our experimental set-up specifically studied effects of microplastic fibers on developing  
52 organoids, we next studied whether already-developed, mature organoids were also affected  
53 by nylon microplastics. We therefore exposed organoids to nylon reference microfibers  
54 during organoid formation as before (14-day incubation) and we additionally exposed fully  
55 developed 14-day organoids to microfibers on top of the Matrigel or to nylon leachate for  
56 an additional 7 days. Interestingly, in contrast to the strong effects observed on developing  
57 organoids, we found that the compounds leaching from nylon had no effects on already-  
58 developed organoids (Figure 7A), as reflected by unchanged numbers of organoids (Figure  
59 7B and C) and unchanged sizes (Figure 7D and E). This suggests that these nylon leachates  
60 are mostly harmful to differentiation of epithelial progenitors, but do not kill fully  
61 differentiated epithelial cells.

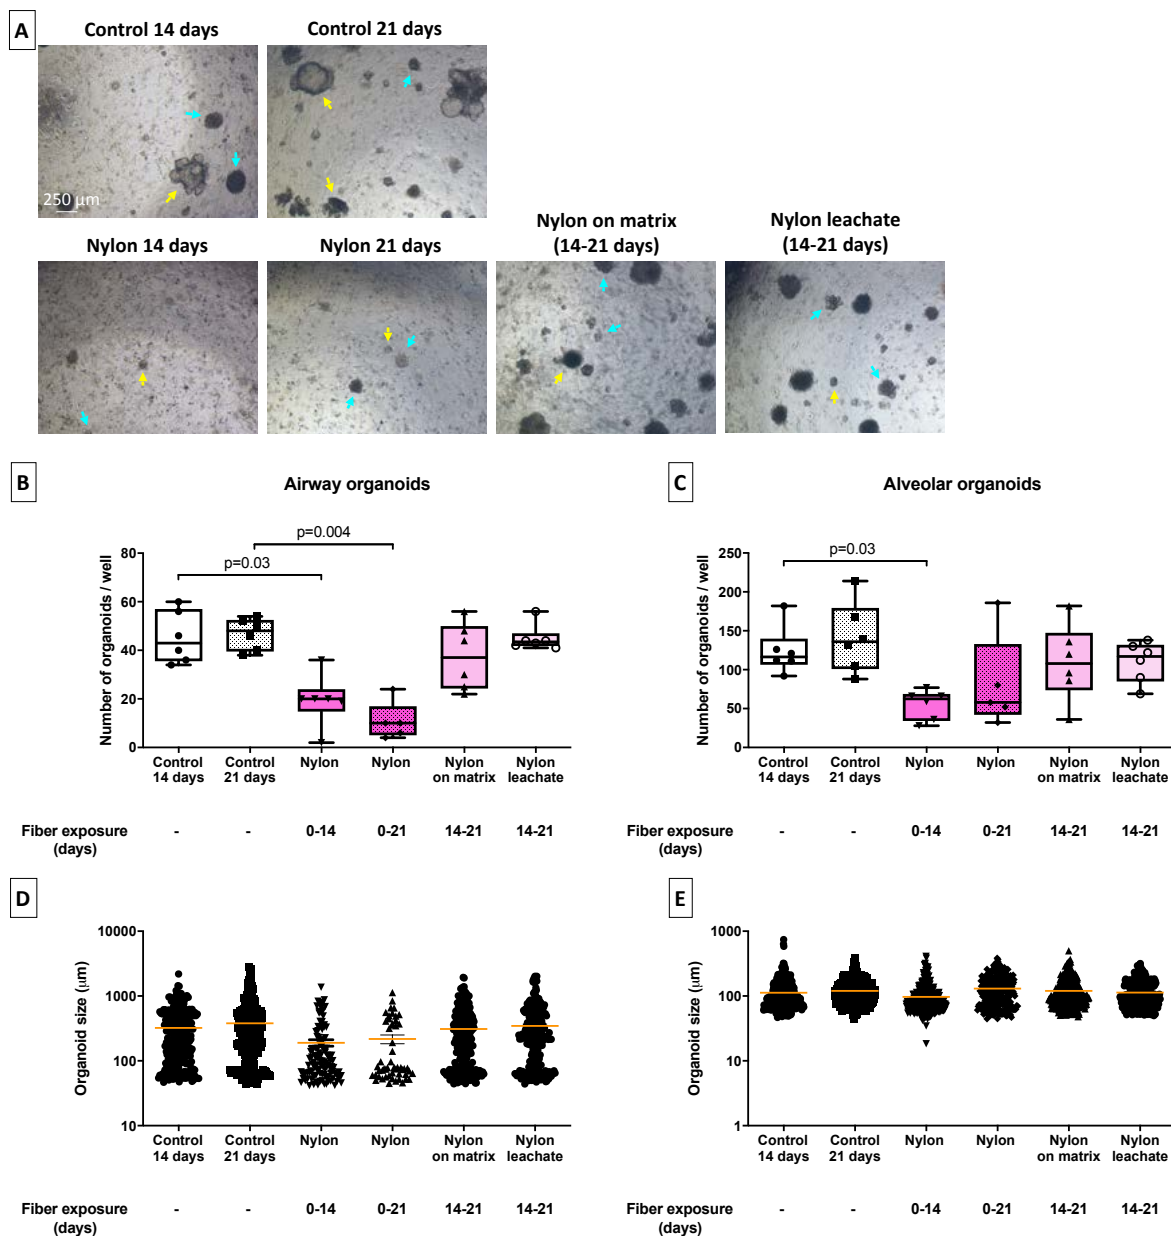

**Figure 7. Effects of nylon reference fiber leachate on already-developed lung organoids.**

(A) Representative light microscopy images of all treatment conditions. Yellow arrows in the light microscopy images indicate airway organoids, whereas cyan arrows indicate alveolar organoids. (B and C) Quantification of the numbers and (D and E) sizes of airway and alveolar organoids following exposure to no or 5000 nylon microfibers (equivalent to 39 µg/ml nylon) for 14 or 21 days. A set of other organoids developed without treatment for 14 days and were exposed to nylon by adding 5000 microfibers (equivalent to 39 µg/ml nylon) on top of the Matrigel or by adding nylon leachate to the culture medium for another 7 days (n=6 independent isolations). Groups were compared using a Kruskal-Wallis test with Dunn's correction for multiple testing.  $P < 0.05$  was considered significant.



## 74 **Exposure to nylon inhibited epithelial development pathways and stimulated** 75 **expression of ribosome components**

76 To better understand the mechanisms behind the observed effects on the growth of airway  
77 organoids, we performed bulk RNA-sequencing (RNAseq) analysis on epithelial cells and  
78 fibroblasts resorted from organoid cultures exposed to two different concentrations of nylon  
79 fibers (2000 or 5000 fibers) or not. The condition of 2000 fibers was added because the  
80 effect of 5000 fibers on airway epithelial development was already profound and we wanted  
81 to investigate more subtle changes. However, both conditions had an enormous impact on  
82 epithelial gene expression as depicted by the volcano plots (Figure 8A-D). Exposure to  
83 2000 nylon fibers (equivalent to 16  $\mu\text{g/ml}$  nylon) resulted in 16455 transcripts being  
84 differentially expressed at least two-fold compared to nonexposed controls, with an q value  
85  $<0.05$  (p value corrected for the false discovery rate), with most being downregulated  
86 (Figure 8A and C). Exposure to 5000 nylon fibers (equivalent to 39  $\mu\text{g/ml}$  nylon) resulted in  
87 39395 transcripts being differentially expressed at least two-fold compared to nonexposed  
88 controls, with most being upregulated (Figure 8B and D).

89 To reduce the number of transcripts, we then selected only those transcripts that had an  
90 average basemean expression of at least 10 and were significantly (q value  $<0.05$ ) up or  
91 downregulated in both exposure conditions of 2000 and 5000 nylon fibers compared to  
92 nonexposed controls. This resulted in 10764 transcripts that were differentially expressed  
93 compared to nonexposed controls, with 5522 being downregulated and 5242 being  
94 upregulated. The downregulated transcripts were then sorted on the lowest q value for  
95 exposure to 2000 fibers and the upregulated transcripts were sorted on the lowest q value  
96 for exposure to 5000 fibers and the top 500 genes of each were used for pathway analysis  
97 using Metascape (47).

98 The top pathways identified for downregulated genes following nylon exposure were highly  
99 enriched for epithelial development and function (figure 8E-F), while the top pathways  
00 identified for upregulated genes were highly enriched for mRNA translation and protein  
01 synthesis (figure 8G-H).



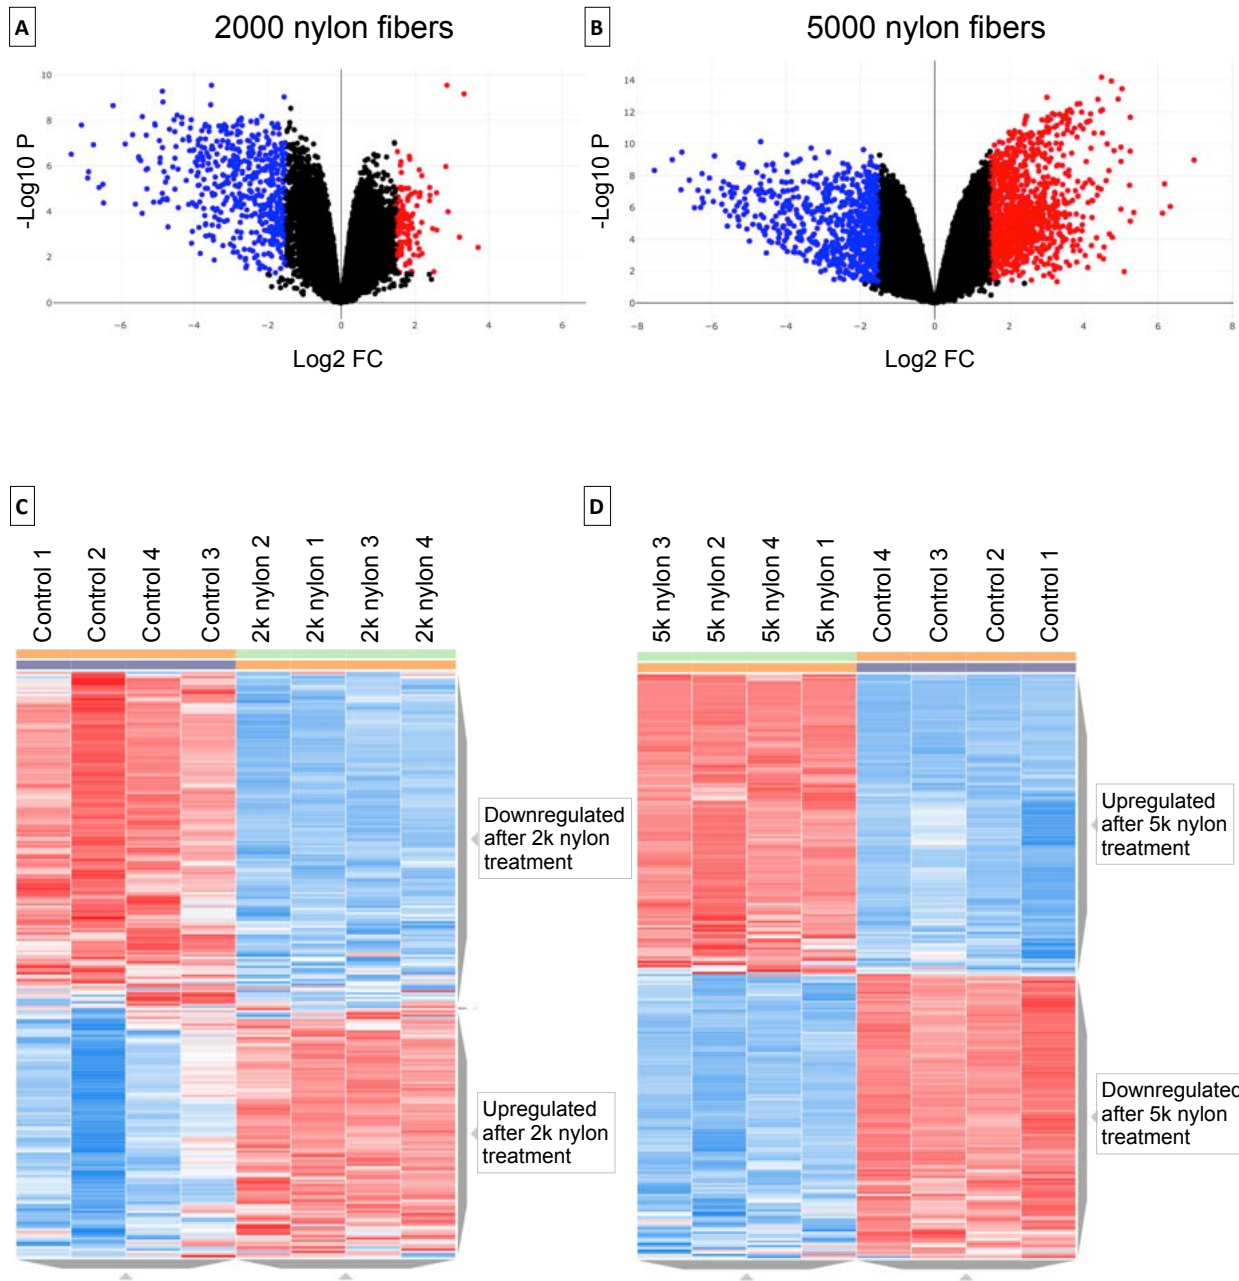

04

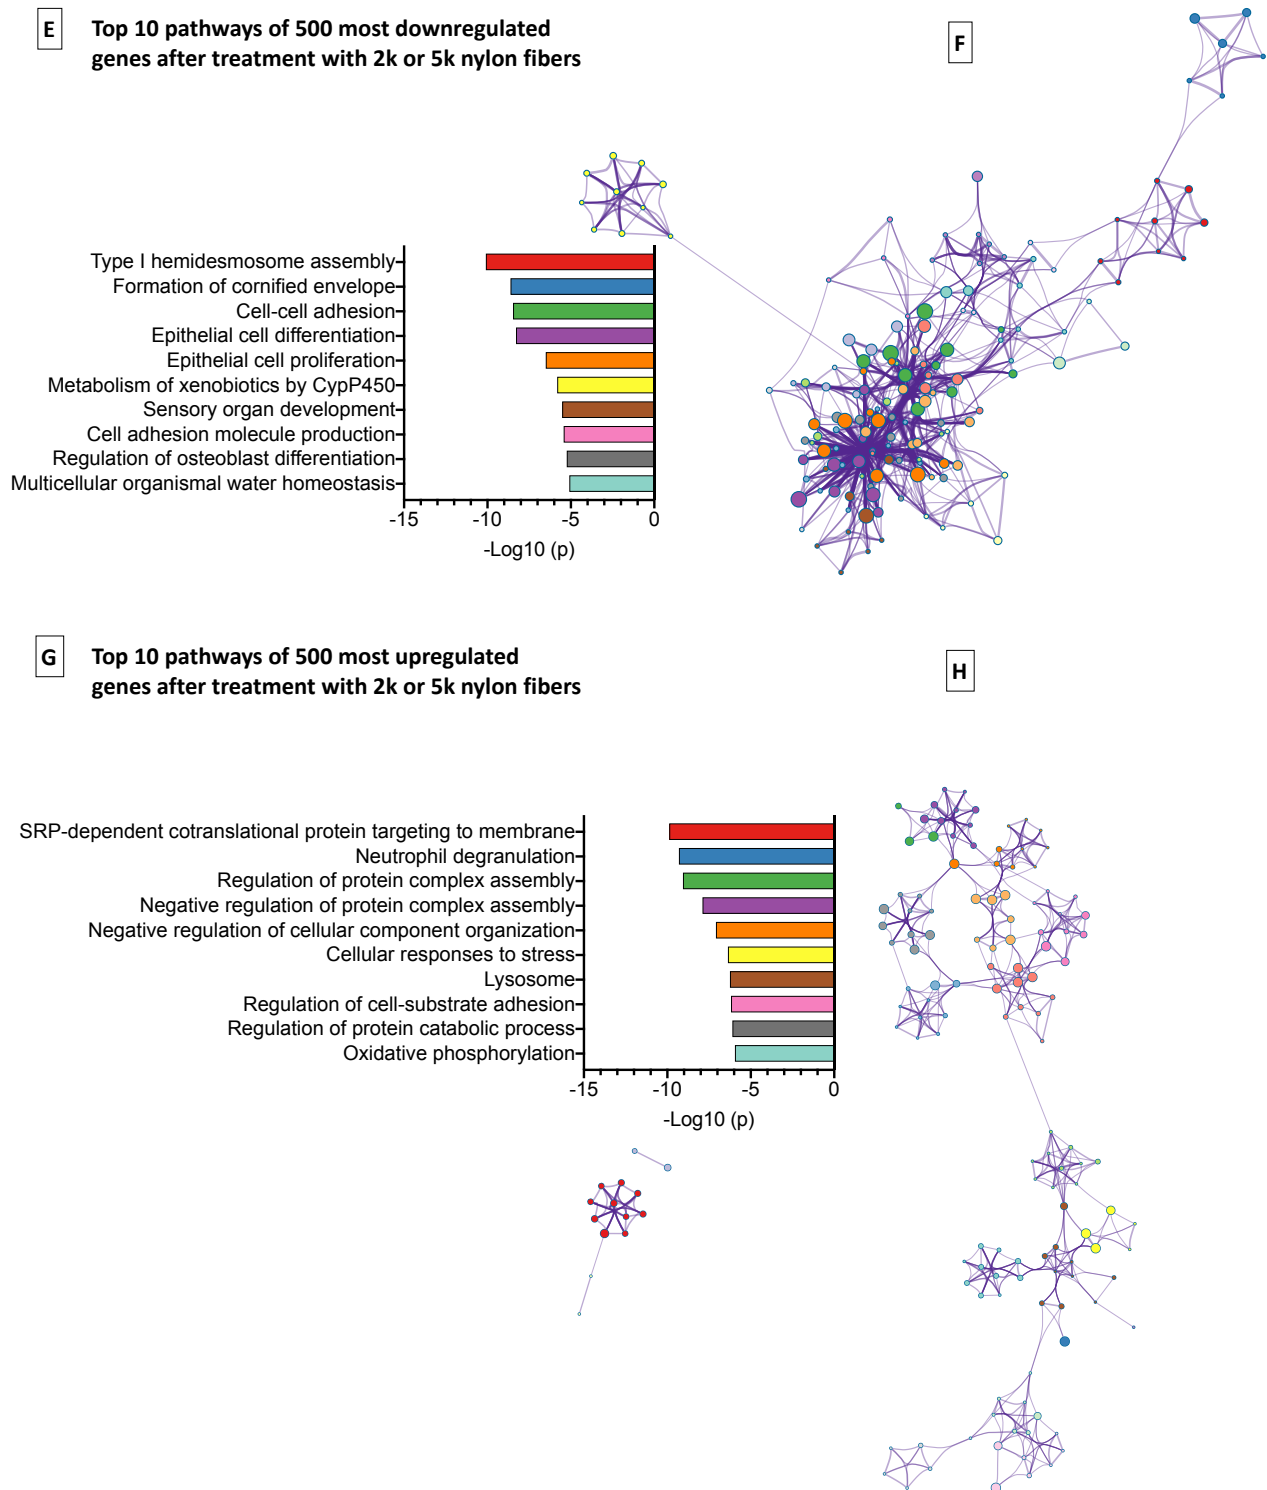

05  
 06 **Figure 8: RNAseq analysis of epithelial cells exposed to nylon or not. (A)** Volcano plot of  
 07 differentially expressed genes by epithelial cells exposed to 2000 nylon fibers (equivalent to  
 08 16  $\mu\text{g/ml}$  nylon) or not. **(B)** Volcano plot of differentially expressed genes by epithelial cells  
 09 exposed to 5000 nylon fibers (equivalent to 39  $\mu\text{g/ml}$  nylon) or not. Upregulated genes are  
 10 marked in red, downregulated genes in blue. Genes were selected with thresholds of fold  
 11 change  $>2$  and  $q < 0.05$ . **(C)** Unsupervised clustering heat map of epithelial cells exposed to

12 2000 nylon fibers (equivalent to 16  $\mu\text{g}/\text{ml}$  nylon) or not. **(D)** Unsupervised clustering heat  
13 map of epithelial cells exposed to 5000 nylon fibers (equivalent to 39  $\mu\text{g}/\text{ml}$  nylon) or not.  
14 **(E)** Metascape bar graphs of top 10 nonredundant enrichment clusters of genes  
15 downregulated by exposure to nylon ordered based on statistical significance ( $p$  value). **(F)**  
16 Metascape enrichment network visualization showing the intra-cluster and inter-cluster  
17 similarities of enriched terms of genes downregulated by exposure to nylon, up to ten terms  
18 per cluster. Cluster annotations colors are shown in bar graph of panel E. **(G)** Metascape  
19 bar graphs of top 10 nonredundant enrichment clusters of genes upregulated by exposure to  
20 nylon ordered based on statistical significance ( $p$  value). **(H)** Metascape enrichment  
21 network visualization showing the intra-cluster and inter-cluster similarities of enriched  
22 terms of genes upregulated by exposure to nylon, up to ten terms per cluster. Cluster  
23 annotations colors are shown in bar graph of panel E. 2k: 2000 fibers; 5k: 5000 fibers.

24  
25 We then investigated expression of individual genes in the top 5 enriched pathways for up  
26 and downregulated genes in more detail (Figures 8E-H). The top 5 enriched pathways for  
27 downregulated genes were type I hemidesmosome assembly, formation of cornified  
28 envelope, cell-cell adhesion, epithelial cell differentiation, and epithelial cell proliferation,  
29 while the top 5 pathways for upregulated genes were SRP-dependent cotranslational protein  
30 targeting to membrane, neutrophil degranulation, regulation of protein complex assembly,  
31 negative regulation of protein complex assembly, and negative regulation of cellular  
32 component organization.

33 We first investigated the downregulated genes and many of them represent important  
34 epithelial populations in the lung. We therefore investigated genes associated with specific  
35 epithelial populations (listed in table 1). The expression of these genes correlated well with  
36 our organoid findings that airway epithelial cell growth was most affected by exposure to  
37 nylon fibers, while alveolar epithelial cell growth was less affected (Figure 9). Both AEC I  
38 and AEC II genes (Figure 9A) were only marginally lower expressed after exposure to  
39 nylon while most genes for basal cells (Figure 9B), ciliated cells (Figure 9C), club cells and  
40 goblet cells (Figure 9D) were expressed at significantly lower levels compared to controls  
41 with two noticeable exceptions: ciliated cell marker *Tuba1a* and club cell marker *Scgb1a1*,  
42 that were expressed at significantly higher levels compared to nonexposed controls.

43 Proliferation markers like proliferation marker protein 67 (*Mki67*), forkhead box protein M1  
44 (*Foxm1*), and polo-like kinase 1 (*Plkl1*, Figure 9E) confirmed this general lack of

45 proliferation in epithelial cells as all three were expressed at lower levels in a dose-  
 46 dependent manner after exposure to nylon fibers. Expression of genes for signaling  
 47 molecules essential for epithelial growth and development were impressively and dose-  
 48 dependently downregulated by nylon exposure as well (Figure 9F), including *Notch1* and  
 49 *Notch2* and their ligands Jagged 1 (*Jag1*) and 2 (*Jag2*) (48-50), *Bmp4* and *Bmp7* (51-53),  
 50 *Wnt4* and *Wnt7a* (54, 55), and the receptor for hepatocyte growth factor, *Met*. The lower  
 51 expression of basal cell-specific markers and essential factors that are needed for  
 52 differentiation of other cell types like ciliated and goblet cells may explain why the growth  
 53 of in particular airway organoids was inhibited most by nylon.

54  
 55 **Table 1:** Markers associated with different epithelial populations in lung tissue.

| Cell type                                  | Protein name                                         | Gene name      |
|--------------------------------------------|------------------------------------------------------|----------------|
| <b>Epithelial cells present in airways</b> |                                                      |                |
| Basal cells                                | Transformation-related protein 63                    | <i>Trp63</i>   |
|                                            | Keratin 5                                            | <i>Krt5</i>    |
|                                            | Integrin alpha-6                                     | <i>Itga6</i>   |
|                                            | Nerve growth factor receptor                         | <i>Ngfr</i>    |
| Ciliated epithelial cells                  | Forkhead box J1                                      | <i>Foxj1</i>   |
|                                            | Serine/threonine kinase 11                           | <i>Stk11</i>   |
|                                            | Acetylated alpha tubulin                             | <i>Tuba1a</i>  |
| Goblet cells                               | Mucin 5 subtype B                                    | <i>Muc5b</i>   |
|                                            | Mucin subtype AC                                     | <i>Muc5ac</i>  |
| Club cells                                 | Secretoglobulin family 1A member 1                   | <i>Scgb1a1</i> |
|                                            | BPI fold containing family A member 1                | <i>Bpifa1</i>  |
| <b>Epithelial cells present in alveoli</b> |                                                      |                |
| Alveolar epithelial cells type I (AECI)    | Homeodomain-only protein homeobox                    | <i>Hopx</i>    |
|                                            | Advanced glycosylation end-product specific receptor | <i>Ager</i>    |
| Alveolar epithelial cells type II (AECII)  | Surfactant protein C                                 | <i>Sftpc</i>   |
|                                            | Surfactant protein B                                 | <i>Sftpb</i>   |

56  
 57 To exclude the possibility that these effects on epithelial cells were the result of a decreased  
 58 support function from fibroblasts, for instance by nylon selectively killing fibroblasts or  
 59 inhibiting the expression of important growth factors, we separately analyzed the resorted  
 60 fibroblast fraction for expression of proliferation genes and important growth factors, i.e.  
 61 *Mki67*, *Foxm1*, *Plk1*, fibroblast growth factors 2, 7, and 10 (*Fgf2*, *Fgf7*, and *Fgf10*), *Wnt2*,  
 62 *Wnt5a*, and hepatocyte growth factor (*Hgf*) (33). None of these genes were negatively  
 63 affected in fibroblasts after exposure to nylon fibers compared to untreated controls and  
 64 expression of most actually went up slightly (Figure S5).

65 The genes most prominently upregulated after exposure to nylon fibers were mostly  
66 encoding for ribosomal proteins, with ribosomal protein L28 (*Rpl28*), L31 (*Rpl31*), and L38  
67 (*Rpl38*) being most profoundly upregulated (Figure 9G). Ribosomal proteins are a large  
68 family of proteins and essential parts of ribosomes translating mRNA to protein. Recent  
69 data has shown that heterogeneity in ribosomal protein composition within ribosomes  
70 makes them selective for translating subpools of transcripts (56). For instance, Rpl38 has  
71 been shown to regulate translation of the homeobox (*Hox*) genes, that are key in anatomical  
72 development (57). We therefore also investigated the expression of all *Hox* genes and some  
73 specific members of this family involved in lung epithelial development in more detail  
74 (Figure 9H) (58, 59). After exposure to nylon fibers, expression of *Hox* family members  
75 was significantly higher and this pattern was seen for highlighted members *Hoxa4*, *Hoxa5*,  
76 *Hoxc9*, and *Hoxb3* as well.

65  
66  
67  
68  
69  
70  
71  
72  
73  
74  
75  
76  
77

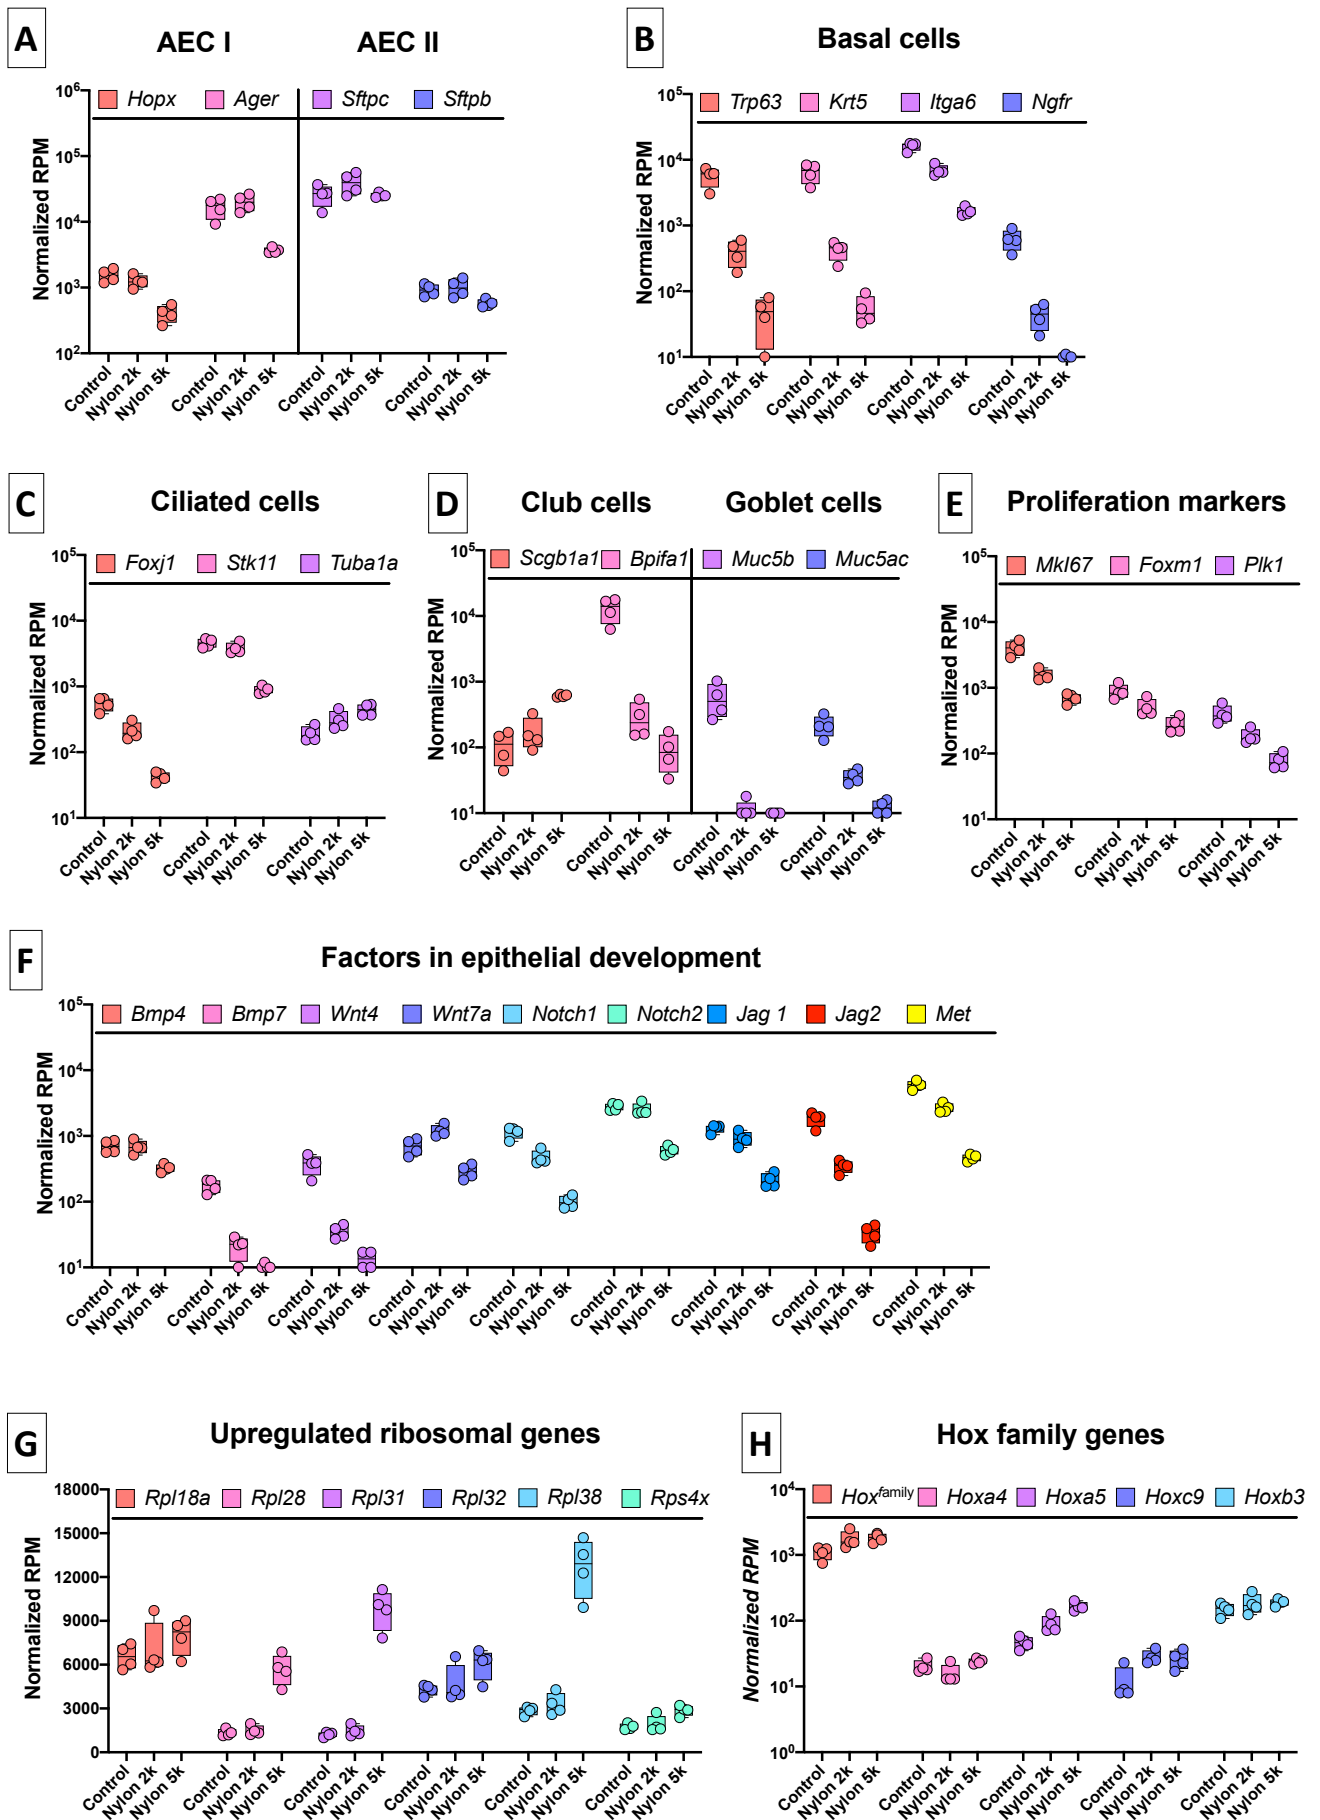

79 **Figure 9: Expression profiles of individual genes from the pathway analyses.** Genes  
80 shown were significantly differentially expressed in epithelial cells isolated from organoids  
81 exposed to 2000 (2k) or 5000 (5k) nylon fibers compared to untreated controls according to  
82 a false discovery rate of  $q < 0.05$  ( $n=4$  independent isolations). The following genes in the  
83 following conditions were not significantly different: 2k nylon: *Hopx*, *Ager*, *Sftpc*, *Sftpb*,  
84 *Stk11*, *Scgb1a1*, *Bmp4*, *Notch2*, *Hoxa4*; 5k nylon: *Hopx*, *Ager*, *Plk1*.  
85 (A) Genes highly expressed by alveolar epithelial cells type I (AECI) and type II (AECII).  
86 (B) Genes highly expressed in basal cells. (C) Genes highly expressed in ciliated cells. (D)  
87 Genes highly expressed in club cells and goblet cells. (E) Genes associated with  
88 proliferation. (F) Genes encoding factors important for epithelial development. (G) Genes  
89 encoding ribosomal proteins. (H) Genes encoding Hox family genes.

## 92 Discussion

93 Recent reports have shown that man-made fibers are ubiquitously present in indoor air (9,  
94 35-38). It is estimated that approximately 30% of those indoor fibers are of plastic origin,  
95 particularly from textiles (9, 35-38). The lungs are continuously exposed to this airborne  
96 microplastic pollution (60), but the consequences of common household exposure on our  
97 lungs are unclear. In our present work, we found that both polyester and nylon microfibers  
98 negatively affected the growth and development of human and murine lung organoids, with  
99 nylon being the most harmful. Already established lung organoids were not affected and  
00 therefore our results may be of particular importance for young children with developing  
01 airways and for people undergoing high levels of epithelial repair, such as people with  
02 respiratory diseases.

03  
04 Nylon was found to be the most consistently harmful for growth of airway organoids and  
05 was less inhibitory for growth of alveolar organoids, while polyester affected both types  
06 equally but less profoundly than nylon. This was the case for our reference fibers as well as  
07 environmentally relevant fibers made from fabrics purchased in a local fabric store. The  
08 gene expression analysis also confirmed that growth of alveolar organoids was affected less  
09 by nylon exposure and even appeared *induced* after treatment with leachate or lower  
10 numbers of nylon fibers. The explanation for this finding may be found in the  
11 downregulation of Notch signaling pathway members by nylon fibers. Multiple studies have



12 shown that Notch signaling is required for development of airway epithelial cells, most  
13 specifically goblet cells, whereas disruption of this signaling boosts alveolar epithelial  
14 development (61, 62). Both *Notch1* and *Notch2*, as well as their ligands *Jag1* and *Jag2* were  
15 expressed at significantly lower levels after nylon treatment, suggesting disruption of Notch  
16 signaling may be responsible for the divergent effect nylon has on airway versus alveolar  
17 epithelial growth.

18 The Notch pathway, incidentally, is also important for the development of club cells (63).  
19 Morimoto and colleagues showed that *Notch2* was involved in the decision between club  
20 cell or ciliated cell development. Interestingly, the gene expression data for club cells and  
21 ciliated cells were somewhat ambiguous, with important markers for these cell types having  
22 higher expression (*Scgb1a1* for club cells and *Tub1a1* for ciliated cells) and others having  
23 lower expression (*Bpifal* for club cells and *Foxj1* and *Stk11* for ciliated cells) after nylon  
24 exposure. This may suggest that the lower expression of *Notch2* may be hampering the cell  
25 fate decision between club and ciliated cells in some way, resulting in improperly  
26 differentiated cell types. In combination with the inhibited development of basal epithelial  
27 cells and goblet cells, this altered airway epithelial differentiation may explain the  
28 bronchiolitis found in nylon flock workers and rats exposed to nylon (64-66).

29  
30 Our results demonstrated that the negative effect of nylon fibers on development of  
31 particularly airway organoids was caused by components leaching from these fibers. As the  
32 most abundant components in this leachate, the cyclic oligomers, were not responsible for  
33 this effect, we used RNAseq analysis to look for signatures of other components. Although  
34 we could not detect bisphenol A in our leachate, it is of interest to note that exposure of fruit  
35 flies to bisphenol A specifically upregulated ribosome-associated genes (67), similar to  
36 what we found in our study. The association of these *Rpl* genes with the *Hox* family genes is  
37 of particular interest for lung epithelial development. *Rpl38* was one of the three most  
38 upregulated *Rpl* genes by nylon and was shown to interact with a specific subset of *Hox*  
39 genes including *Hoxa4*, *Hoxa5*, and *Hoxb3* (57). These have all been associated with  
40 epithelial differentiation, with *Hoxa5* taking a center stage in goblet versus club cell  
41 differentiation (58, 59). Boucherat and colleagues showed that loss of *Hoxa5* drove  
42 epithelial differentiation towards goblet cell differentiation at the expense of club cell  
43 differentiation and *Scgb1a1* expression (58). Remarkably, *Hoxa5* was expressed at  
44 significantly higher levels in our dataset in a dose-dependent manner after exposure to

45 nylon and we also found a matching dose-dependent increase in *Scgbl1* and decrease in  
46 *Muc5ac* and *Muc5b* expression. Taken together our data suggest that component (s) in  
47 nylon leachate may be skewing differentiation of epithelial progenitors away from airway  
48 epithelial cells possibly through changes in expression of *Hoxa5* and/or *Notch*. Which  
49 components or combinations of components are responsible for these effects is still an open  
50 question.

51  
52 A strength of using lung organoids is the opportunity to directly translate murine findings to  
53 human lung epithelial repair (32, 33, 43, 68, 69). Using cells isolated from human lungs we  
54 have shown human epithelial cells respond similarly to polyester and nylon fibers,  
55 demonstrating our results are relevant for human epithelial differentiation and growth too.  
56 Despite this advantage, lung organoids are a relatively simple model of lung tissue and lack  
57 the immune and endothelial compartment present *in vivo*. Especially having the immune  
58 compartment present could alter how lung tissue responds to these microplastic fibers. For  
59 example, innate immune cells like macrophages are also one of the first cells to come into  
60 contact with microplastic fibers following inhalation and macrophages are known to  
61 respond strongly to inhaled particles and fibers (70) and are also important for lung repair  
62 (71). It is therefore recommended to include lung macrophages in lung organoid cultures in  
63 future studies as was done before by Choi *et al.* (72). This way, a more comprehensive view  
64 on the interaction between pivotal lung cells and microplastics can be obtained.

65  
66 The implication of our results for the human population is of high relevance. It is important  
67 to note that similar to the high occupational exposure in industry workers, the microplastic  
68 fiber doses as used in our *in vitro* experiments are much higher than daily exposure for most  
69 people. Previous studies estimated that a male person with light activity may inhale around  
70 272 microplastic particles per day based on air sampling using a breathing thermal manikin  
71 (60). The total surface of airway epithelial cells is 2471 cm<sup>2</sup> for human lungs (73), resulting  
72 in 0.1 particle/cm<sup>2</sup>. Our murine cultures had an average of 70 airway organoids with an  
73 average size of 320 μm, resulting in a total surface of 0.2 cm<sup>2</sup> that was incubated with 5000  
74 fibers or 25,000 fibers/cm<sup>2</sup>. For our calculations we assumed these particles/fibers will get  
75 trapped onto airway epithelial cells. Generally particles or fibers of sizes between 10 and  
76 100 μm will deposit onto epithelial cells covering airway walls (40). Only fibers with a  
77 diameter smaller than 3 μm have the ability to penetrate deep into the lungs and reach the

78 alveoli. Our fiber sizes were limited by the availability of polyester and nylon filaments of  
79 standardized small diameters and therefore were not small enough for alveolar deposition.  
80 However, airway trapping can still cause local harm as we found nylon fibers to inhibit  
81 airway epithelial differentiation most. It will therefore be crucial to study in more detail  
82 how many and what kind of fibers deposit in which regions of the lungs and what fraction  
83 can still be cleared. In addition, we need to gather more information about exposure levels  
84 in indoor environments to assess real-life inhalation levels. A limitation here is the detection  
85 of microplastics, as smaller particles might escape current detection methods (10, 74).  
86 Especially our finding that epithelial differentiation and repair mechanisms are affected  
87 most by microplastics exposure, suggests airborne microplastics may be most harmful to  
88 young children with developing airways and to people undergoing high levels of epithelial  
89 repair. These could be people with a chronic lung disease or even healthy individuals  
90 suffering from a seasonal respiratory virus infection.

91  
92 In conclusion, with the ongoing and growing use of plastics, potential associated health  
93 problems in the human population may also increase. The results of the present study  
94 strongly encourage to look in more detail at both hazard of and exposure to microplastic  
95 fibers, and outcomes of these experiments will be valuable to advise organizations such as  
96 the World Health Organization and Science Advice for Policy by European Academies who  
97 have recently stated that more research is urgently needed (30, 31). Importantly, future  
98 research should focus on examining the presence and number of such fibers both in our  
99 indoor environment and in human lung tissue, to better estimate the actual risk of these  
00 fibers to human health.

01  
02  
03

## 04 **Materials and Methods**

05

### 06 **Production of microfibers and leachate**

#### 07 *Reference microfibers and leachate*

08 Microfibers of standardized dimensions were produced as described before (34). In short,  
09 polyester and nylon fibers (both Goodfellow, UK) with filament diameters of  $14\pm 3.5\ \mu\text{m}$   
10 and  $10\pm 2.5\ \mu\text{m}$  respectively were aligned by wrapping them around a custom-made spool,  
11 coated with a thin layer of cryo compound (KP-CryoCompound, VWR International B.V.,  
12 PA, USA) and frozen. Aligned fibers were cut into similar length parts ( $\sim 2\ \text{cm}$ ) using a  
13 scalpel (Swann-Morton, UK) and moulded onto a compact block that was oriented  
14 perpendicular to the base of a cryomicrotome (Microm HM 525, Thermo Fisher Scientific,  
15 MA, USA). Microfibers were cut at lengths of  $50\ \mu\text{m}$  for polyester and  $30\ \mu\text{m}$  for nylon,  
16 after which the fibers were thawed, washed with water through a  $120\ \mu\text{m}$  filter (Merck  
17 Millipore, MA, USA) to remove miscut fibers and contaminants, collected by vacuum  
18 filtration using  $8\ \mu\text{m}$  polycarbonate membrane filters (Sterlitech, WA, USA) and stored dry  
19 at  $-20^\circ\text{C}$ .

20 Nylon leachate was produced by incubation of nylon reference microfibers in phosphate  
21 buffered saline (PBS) for 7 days at  $37^\circ\text{C}$  in the dark, followed by filtration using a  $0.2\ \mu\text{m}$   
22 syringe filter (GE Healthcare Life Sciences, UK). The leachate was stored at  $-20^\circ\text{C}$  until  
23 further use.

#### 24 *Environmental microfibers*

25 Environmental polyester and nylon textile microfibers were prepared from commercially  
26 available pure fabrics. White polyester fabric was washed at  $40^\circ\text{C}$  in a washing machine  
27 (Samsung, South Korea) and dried in a tumble dryer (Whirlpool, MI, US). Fibers with an  
28 estimated filament diameter of  $15\ \mu\text{m}$  were collected on the filter of the tumble dryer and  
29 subsequently frozen with cryo compound and sectioned into lengths of  $50\ \mu\text{m}$  using a  
30 cryomicrotome. White nylon fabric (estimated filament diameter of  $40\ \mu\text{m}$ ) was cut into  
31 small squares, stacked, frozen with cryo compound, and cut into lengths of  $12\ \mu\text{m}$ . All  
32 microfibers were thawed, washed with water through a  $120\ \mu\text{m}$  filter, collected by vacuum  
33 filtration ( $8\ \mu\text{m}$  filter) and finally stored at  $-20^\circ\text{C}$ .

34

## 35 **Characterization of microfibers and leachate**

### 36 *Scanning electron microscopy*

37 Samples were prepared for scanning electron microscopy (SEM) analysis on an aluminium  
38 sample holder using adhesive carbon-coated tape. Excessive microfibers were removed  
39 using pressurized air, after which the samples were sputter-coated with 10 nm of gold.  
40 Images were obtained using a JSM-6460 microscope (Jeol, Japan) at an acceleration voltage  
41 of 10 kV.

### 42 *Dimensions*

43 Digital photomicrographs were captured at 200× magnification using a Nikon Eclipse  
44 TS100 inverted microscope coupled to a Nikon Digital Sight DS-U3 microscope camera  
45 controller (both Japan), after which microfiber diameters and lengths (median of 200) were  
46 determined using NIS-Elements AR 4.00.03 software.

## 48 **Ethics**

### 49 *Animal experiments*

50 The experimental protocol for the use of mice for epithelial cell isolations was approved by  
51 the Animal Ethical Committee of the University of Groningen (The Netherlands) and all  
52 experiments were performed according to strict governmental and international guidelines  
53 on animal experimentation. C57BL/6 mice (8-14 weeks) were bred at the Central Animal  
54 Facility of the University Medical Center Groningen (UMCG) (IVD 15303-01-004).  
55 Animals received ad libitum normal diet with a 12 h light/dark cycle.

### 56 *Human lung tissue*

57 Histologically normal lung tissue was anonymously donated by individuals with COPD  
58 (n=6) or without COPD (n=1) undergoing surgery for lung cancer and not objecting to the  
59 use of their tissue. COPD patients included ex- and current- smoking individuals with  
60 GOLD stage I-IV disease (GOLD I=1, GOLD II=2, GOLD IV=3). Subjects with other lung  
61 diseases such as asthma, cystic fibrosis, or interstitial lung diseases were excluded. The  
62 study protocol was consistent with the Research Code of the University Medical Center  
63 Groningen (UMCG) and Dutch national ethical and professional guidelines  
64 ([www.federa.org](http://www.federa.org)). Sections of lung tissue of each patient were stained with a standard  
65 haematoxylin and eosin staining and checked for abnormalities by a lung pathologist.

## Cell cultures

Mouse lung fibroblasts (CCL-206, ATCC, Wesel, Germany) or human lung fibroblasts (MRC5, ATCC, CCL-171) were cultured in 1:1 DMEM (Gibco, MD, USA) and Ham's F12 (Lonza, Switzerland) or Ham's F12 respectively, both supplemented with 10% heat inactivated fetal bovine serum (FBS, GE Healthcare Life Sciences), 100 U/ml penicillin and 100 µg/ml streptomycin, 2 mM L-glutamine and 2.5 µg/ml amphotericin B (all Gibco). Fibroblasts were cultured at 37°C under 5% CO<sub>2</sub> and humidified conditions. For use in organoid cultures, near-confluent cells were proliferation-inactivated by incubation with 10 µg/ml mitomycin C (Sigma-Aldrich, MO, USA) in cell culture medium for 2 hours, after which they were washed in PBS, and left in normal medium for at least 1 hour before trypsinizing and counting.

## Lung epithelial cell isolation

### *Mouse lung epithelial cell isolation*

Epithelial cells were isolated from lungs of mice using antibody-coupled magnetic beads (microbeads) as described before (32, 33, 68). In short, mice were sacrificed under anaesthesia, after which the lungs were flushed with 0.9% NaCl and instilled with 75 caseinolytic units/1.5 ml dispase (Corning, NY, USA). After 45 minutes of incubation at room temperature, the lobes (excluding trachea and extrapulmonary airways) were homogenized in DMEM containing 100 U/ml penicillin and 100 µg/ml streptomycin and 40 µg/ml DNase1 (PanReac AppliChem, Germany), washed in DMEM (containing penicillin, streptomycin and DNase1), and the digested tissue was passed through a 100 µm cell strainer. The suspension was incubated for 20 minutes at 4°C with anti-CD31 and anti-CD45 microbeads in MACS buffer and magnetically sorted using LS columns. The CD31<sup>-</sup>/CD45<sup>-</sup> flow-through was incubated for 20 minutes at 4°C with anti-CD326 (EpCAM) microbeads in MACS buffer, after which purified epithelial lung cells were obtained by positive selection using LS columns. CD326-positive epithelial cells were resuspended in CCL206 fibroblast medium, counted and seeded into Matrigel immediately after isolation with equal numbers of CCL206 fibroblasts, as described below. All materials were purchased at Miltenyi Biotec (Germany) unless stated otherwise.

## 97 *Human lung epithelial cell isolation*

98 Human lung epithelial cells were isolated from lung tissue specimens obtained from  
99 patients. Peripheral lung tissue was minced and dissociated in DMEM-containing enzymes  
00 (Multi Tissue Dissociation Kit) at 37°C using a gentleMACS Octo Dissociator. The cell  
01 suspension was filtered (70 µm and 35 µm nylon strainer, respectively) prior to 20-minute  
02 incubation at 4°C with anti-CD31 and anti-CD45 microbeads in MACS buffer. The  
03 CD31<sup>-</sup>/CD45<sup>-</sup> fraction was obtained by negative selection using an AutoMACS. Epithelial  
04 cells were then isolated by positive selection after 20-minute incubation at 4°C with anti-  
05 CD326 (EpCAM) microbeads in MACS buffer. Human EpCAM<sup>+</sup> cells were resuspended  
06 in 1:1 DMEM and Ham's F12, supplemented with 10% heat inactivated FBS, 100 U/ml  
07 penicillin and 100 µg/ml streptomycin, 2 mM L-glutamine and 2.5 µg/ml amphotericin B,  
08 counted and seeded into Matrigel immediately after isolation with equal numbers of MRC5  
09 fibroblasts. All materials were purchased at Miltenyi Biotec unless stated otherwise.

## 11 **Lung organoid cultures**

12 Lung organoids were grown as previously described with minor modifications (32, 33, 68).  
13 For mouse lung organoids, 10,000 EpCAM<sup>+</sup> cells and 10,000 CCL206 fibroblasts were  
14 seeded, and for human lung organoids, 5,000 EpCAM<sup>+</sup> cells and 5,000 MRC5 fibroblasts  
15 were seeded in 100 µl growth factor-reduced Matrigel matrix (Corning) diluted 1:1 in  
16 DMEM:Ham's F-12 1:1 containing 10% FBS, 100 U/ml penicillin and 100 µg/ml  
17 streptomycin, 2 mM L-glutamine and 2.5 µg/ml amphotericin B into transwell 24-well cell  
18 culture plate inserts (Corning). Organoids were cultured in DMEM:Ham's F-12 1:1  
19 supplemented with 5% FBS, 100 U/ml penicillin and 100 µg/ml streptomycin, 2 mM L-  
20 glutamine, 2.5 µg/ml amphotericin B, 4 ml/l insulin-transferrin-selenium (Gibco), 25 µg/l  
21 recombinant mouse (Sigma-Aldrich) or human epithelial growth factor (EGF, Gibco) and  
22 300 µg/l bovine pituitary extract (Sigma-Aldrich). During the first 48h of culture, 10 µM Y-  
23 27632 (Axon Medchem, the Netherlands) was added to the medium.

24 A titration curve for polyester or nylon microfibers was made with 2000, 3000, 4000 or  
25 5000 fibers per well corresponding to approximately 49, 73, 98 and 122 µg/ml of polyester  
26 fibers or 16, 23, 31, and 39 µg/ml of nylon fibers. For all other experiments, 5000 polyester  
27 or nylon reference (equivalent to 122 µg/ml of polyester or 39 µg/ml of nylon) or  
28 environmental microfibers (equivalent to 122 µg/ml of polyester or 39 µg/ml of nylon and)



29 were used per condition. Fibers were in direct contact with developing organoids during 14  
30 days by mixing them with Matrigel and cells prior to seeding in the insert, except for those  
31 experiments studying effects of leaching nylon components. In those cases, 5000 polyester  
32 and nylon reference fibers were added on top of the organoids, thereby excluding physical  
33 contact between the microfibers and the developing organoids, or equivalent amounts of  
34 fiber leachate were added to the medium during 14 days of organoid culture. For testing the  
35 effects of nylon oligomers, concentrations between 26.8 ng/ml and 53.6  $\mu$ g/ml were used;  
36 the latter concentration being twice as high as the used fiber concentrations (5000 fibers per  
37 condition). Oligomers were synthesized and characterized as described in the  
38 supplementary materials and methods. All organoid cultures were maintained for 14 to 21  
39 days at 37 °C under 5% CO<sub>2</sub> and humidified conditions. Medium was refreshed 3 times per  
40 week.

41 Organoid colony forming efficiency was quantified by manually counting the total number  
42 of organoids per well after 14 or 21 days of culturing using a light microscope at 100 $\times$   
43 magnification. For mouse organoids, a distinction was made between airway and alveolar  
44 organoids, whereas for human organoids only one organoid phenotype was distinguished.  
45 The diameter of the organoids was measured using a light microscope (Nikon, Eclipse Ti),  
46 only including organoids larger than 50  $\mu$ m in diameter, with a maximum of 50 organoids  
47 per phenotype per well.

### 48

### 49 **Immunofluorescence staining**

50 Organoid cultures in Matrigel were washed with PBS, fixed in ice-cold 1:1 acetone and  
51 methanol (both Biosolve Chimie, France) for 15 minutes at -20°C and washed again with  
52 PBS after which aspecific antibody-binding was blocked for 2 hours in 5% bovine serum  
53 albumin (BSA, Sigma-Aldrich). Organoids were incubated overnight at 4°C with the  
54 primary antibodies (mouse anti-acetylated  $\alpha$ -tubulin (Santa Cruz, TX, USA) and rabbit anti-  
55 prosurfactant protein C (Merck, Germany)) both diluted 1:200 in 0.1% BSA and 0.1%  
56 Triton (Sigma-Aldrich) in PBS. Next, after extensive but gentle washing with PBS,  
57 organoids were incubated with the appropriate Alexa-conjugated secondary antibody for 2  
58 hours at room temperature (Alexa Fluor 488 donkey anti rabbit IgG and Alexa Fluor 568  
59 donkey anti mouse IgG, both Thermo Fisher Scientific) diluted 1:200 in 0.1% BSA and  
60 0.1% Triton in PBS. Organoid cultures were washed with PBS, excised using a scalpel,  
61 mounted on glass slides (Knittel, Germany) using mounting medium containing DAPI

(Sigma-Aldrich) and covered with a cover glass (VWR). Digital photomicrographs were captured at 200× magnification using a DM4000b fluorescence microscope and LAS V4.3 software (both Leica, Germany).

### **Isolation of epithelial cells and fibroblasts from organoid cultures**

200,000 mouse EpCAM+ primary cells and 200,000 CCL206 fibroblasts (n=4 independent isolations) were seeded in 1 ml Matrigel diluted 1:1 in DMEM containing 10% FBS in 6-well plates (Greiner Bio-One, The Netherlands). 12.000 or 30.000 nylon reference microfibers were mixed with Matrigel and cells prior to seeding. Murine organoid culture medium was maintained on top and refreshed every two days. After 7 days, organoid cultures were digested with 50 caseinolytic units/ml dispase for 30 minutes at 37°C, transferred to 15 ml tubes, washed with MACS BSA stock solution and autoMACS rinsing solution (both Miltenyi), and digested further with trypsin (VWR) diluted 1:5 in PBS for 5 minutes at 37°C. The cell suspension was then incubated for 20 minutes at 4°C with anti-EpCAM microbeads in MACS buffer, after which the suspension was passed through LS columns. Both the EpCAM+ (epithelial cells) and EpCAM- (fibroblasts) cell fractions were used for RNA isolation and subsequent sequencing.

### **Library preparation and RNA sequencing**

Total RNA was isolated from EpCAM+ and EpCAM- cell fractions using a Maxwell® LEV simply RNA Cells/Tissue kit (Promega, WI, USA) according to manufacturer's instructions. RNA concentrations were determined using a NanoDrop One spectrophotometer (Thermo Fisher Scientific). Total RNA (300 ng) was used for library preparation. Paired-end sequencing was performed using a NextSeq 500 machine (Illumina; mate 1 up to 74 cycles and mate 2 up to 9 cycles). Mate 1 contained the first STL (stochastic labeling) barcode, followed by the first bases of the sequenced fragments, and mate 2 only contained the second STL barcode. The generated data were subsequently demultiplexed using sample-specific barcodes and changed into fastq files using bcl2fastq (Illumina; version 1.8.4). The quality of the data was assessed using FastQC (75). The STL barcodes of the first mate were separated from the sequenced fragments using an in-house Perl script. Low quality bases and parts of adapter sequences were removed with Cutadapt (version 1.12; settings: q=15, O=5, e=0.1, m=36) (76). Sequenced poly A tails were

94 removed as well, by using a poly T sequence as adapter sequence (T (100); reverse  
95 complement after sequencing). Reads shorter than 36 bases were discarded. The trimmed  
96 fragment sequences were subsequently aligned to all known murine cDNA sequences using  
97 HISAT2 (version 2.1.0; settings: k=1000, --norc). The number of reported alignments, k,  
98 was given a high number in order to not miss any alignment results (some genes have up to  
99 62 transcripts). Reads were only mapped to the forward strand (directional sequencing).  
00 Fragment sequences that mapped to multiple genes were removed (unknown origin). When  
01 fragments mapped to multiple transcripts from the same gene all but one were given a non-  
02 primary alignment flag by HISAT2 (flag 256). These flags were removed (subtraction of  
03 256) by the same Perl script in order to be able to use the Bash-based shell script  
04 (dqRNASeq; see below) that is provided by Bioo Scientific (Perkin Elmer, MA, USA).  
05 Fragments that mapped to multiple transcripts from the same gene were considered unique  
06 and were counted for each of the transcripts. The number of unique fragments (or read  
07 pairs) was determined for each transcript using the script provided by Bioo Scientific  
08 (dqRNASeq; settings: s=8, q=0, m=1). Counts that were used for further analysis were  
09 based on a unique combination of start and stop positions and barcodes (USS + STL). The  
10 full data set is available as Supplemental Table S3 (Supplemental Material available online;  
11 see <https://figshare.com/s/26a93797d19154dc418a>).

### 13 **Data analyses and statistics**

14 All statistics were performed with GraphPad Prism 9.0. Nonparametric testing was used to  
15 compare groups in all experiments. For comparison of multiple-groups, a Kruskal wallis or  
16 Friedman test was used for nonpaired or paired nonparametric data respectively with  
17 Dunn's correction for multiple testing. Differences in organoid size between groups were  
18 tested by using the average size of the organoids per independent experiment. Data are  
19 presented as median  $\pm$  range and p-values  $<0.05$  were considered significant.

20  
21 For RNA sequencing data, the principal component analyses were performed in R using the  
22 R package DESeq2 (version 1.26.0) (77) in order to visualize the overall effect of  
23 experimental covariates as well as batch effects (function: plotPCA). Differential gene  
24 expression analyses (treated vs. nontreated) was performed with the same R package  
25 (default settings; Negative Binomial GLM fitting and Wald statistics; design=~condition),

26 following standard normalization procedures. Transcripts with differential expression >2  
27 (nylon-treated versus nontreated fibroblasts or epithelial cells) and a false discovery rate  
28 smaller than 0.05 (q value) were considered differentially expressed in that specific cell  
29 type. Volcano plots and clustering heat maps were made using BioJupies (78). Pathway  
30 analysis was done using Metascape (47).

## 33 References

- 35 1. J. Gasperi, S. L. Wright, R. Dris, F. Collard, C. Mandin, M. Guerrouache, V. Langlois, F.  
36 J. Kelly, B. Tassin, Microplastics in air: Are we breathing it in. *Current Opinion in*  
37 *Environmental Science & Health* **1**, 1-5 (2018).
- 38 2. C. M. Rochman, Microplastics research-from sink to source. *Science* **360**, 28-29 (2018).
- 39 3. I. E. Napper, A. Bakir, S. J. Rowland, R. C. Thompson, Characterisation, quantity and  
40 sorptive properties of microplastics extracted from cosmetics. *Mar Pollut Bull* **99**, 178-185  
41 (2015).
- 42 4. A. L. Andrady, Microplastics in the marine environment. *Mar Pollut Bull* **62**, 1596-1605  
43 (2011).
- 44 5. V. Hidalgo-Ruz, L. Gutow, R. C. Thompson, M. Thiel, Microplastics in the marine  
45 environment: a review of the methods used for identification and quantification. *Environ*  
46 *Sci Technol* **46**, 3060-3075 (2012).
- 47 6. M. A. Browne, P. Crump, S. J. Niven, E. Teuten, A. Tonkin, T. Galloway, R. Thompson,  
48 Accumulation of microplastic on shorelines worldwide: sources and sinks. *Environ Sci*  
49 *Technol* **45**, 9175-9179 (2011).
- 50 7. J. C. Prata, J. P. da Costa, I. Lopes, A. C. Duarte, T. Rocha-Santos, Environmental  
51 exposure to microplastics: An overview on possible human health effects. *Sci Total*  
52 *Environ* **702**, 134455 (2020).
- 53 8. S. L. Wright, F. J. Kelly, Plastic and Human Health: A Micro Issue? *Environ Sci Technol*  
54 **51**, 6634-6647 (2017).
- 55 9. R. Dris, J. Gasperi, C. Mirande, C. Mandin, M. Guerrouache, V. Langlois, B. Tassin, A  
56 first overview of textile fibers, including microplastics, in indoor and outdoor  
57 environments. *Environmental Pollution* **221**, 453-458 (2017).
- 58 10. R. Dris, J. Gasperi, M. Saad, C. Mirande, B. Tassin, Synthetic fibers in atmospheric  
59 fallout: A source of microplastics in the environment? *Mar Pollut Bull* **104**, 290-293  
60 (2016).
- 61 11. K. Donaldson, D. Brown, A. Clouter, R. Duffin, W. MacNee, L. Renwick, L. Tran, V.  
62 Stone, The pulmonary toxicology of ultrafine particles. *J Aerosol Med* **15**, 213-220  
63 (2002).
- 64 12. G. Oberdorster, E. Oberdorster, J. Oberdorster, Nanotoxicology: an emerging discipline  
65 evolving from studies of ultrafine particles. *Environ Health Perspect* **113**, 823-839 (2005).
- 66 13. S. L. Wright, J. Ulke, A. Font, K. L. A. Chan, F. J. Kelly, Atmospheric microplastic  
67 deposition in an urban environment and an evaluation of transport. *Environ Int* **136**,  
68 105411 (2020).
- 69 14. J. Pauly, S. Stegmeier, H. Allaart, R. Cheney, P. Zhang, A. Mayer, R. Streck, Inhaled  
70 cellulosic and plastic fibers found in human lung tissue. *Cancer Epidemiol Biomarkers*  
71 *Prev* **7**, 419-428 (1998).

- 72 15. J. Burkhart, W. Jones, D. W. Porter, R. M. Washko, W. L. Eschenbacher, R. M. Castellan,  
73 Hazardous occupational exposure and lung disease among nylon flock workers. *Am J Ind*  
74 *Med Suppl* **1**, 145-146 (1999).
- 75 16. W. L. Eschenbacher, K. Kreiss, M. D. Lougheed, G. S. Pransky, B. Day, R. M. Castellan,  
76 Nylon flock-associated interstitial lung disease. *Am J Respir Crit Care Med* **159**, 2003-  
77 2008 (1999).
- 78 17. S. R. Goldyn, R. Condos, W. N. Rom, The burden of exposure-related diffuse lung  
79 disease. *Semin Respir Crit Care Med* **29**, 591-602 (2008).
- 80 18. D. G. Kern, R. S. Crausman, K. T. Durand, A. Nayer, C. Kuhn, 3rd, Flock worker's lung:  
81 chronic interstitial lung disease in the nylon flocking industry. *Ann Intern Med* **129**, 261-  
82 272 (1998).
- 83 19. M. Shuchman, Secrecy in science: the flock worker's lung investigation. *Ann Intern Med*  
84 **129**, 341-344 (1998).
- 85 20. S. E. Turcotte, A. Chee, R. Walsh, F. C. Grant, G. M. Liss, A. Boag, L. Forkert, P. W.  
86 Munt, M. D. Lougheed, Flock worker's lung disease: natural history of cases and exposed  
87 workers in Kingston, Ontario. *Chest* **143**, 1642-1648 (2013).
- 88 21. R. M. Washko, B. Day, J. E. Parker, R. M. Castellan, K. Kreiss, Epidemiologic  
89 investigation of respiratory morbidity at a nylon flock plant. *Am J Ind Med* **38**, 628-638  
90 (2000).
- 91 22. J. C. Pimentel, R. Avila, A. G. Lourenço, Respiratory disease caused by synthetic fibres: a  
92 new occupational disease. *Thorax* **30**, 204-219 (1975).
- 93 23. E. M. Cordasco, S. L. Demeter, J. Kerkay, H. S. Van Ordstrand, E. V. Lucas, T. Chen, J.  
94 A. Golish, Pulmonary manifestations of vinyl and polyvinyl chloride (interstitial lung  
95 disease). Newer aspects. *Chest* **78**, 828-834 (1980).
- 96 24. P. J. Kole, A. J. Löhr, F. Van Belleghem, A. M. J. Ragas, Wear and Tear of Tyres: A  
97 Stealthy Source of Microplastics in the Environment. *Int J Environ Res Public Health* **14**,  
98 (2017).
- 99 25. C. E. Enyoh, A. W. Verla, E. N. Verla, F. C. Ibe, C. E. Amaobi, Airborne microplastics: a  
00 review study on method for analysis, occurrence, movement and risks. *Environ Monit*  
01 *Assess* **191**, 668 (2019).
- 02 26. L. F. Amato-Lourenço, L. Dos Santos Galvão, L. A. de Weger, P. S. Hiemstra, M. G.  
03 Vijver, T. Mauad, An emerging class of air pollutants: Potential effects of microplastics to  
04 respiratory human health? *Sci Total Environ* **749**, 141676 (2020).
- 05 27. G. Favarato, H. R. Anderson, R. Atkinson, G. Fuller, I. Mills, H. Walton, Traffic-related  
06 pollution and asthma prevalence in children. Quantification of associations with nitrogen  
07 dioxide. *Air Qual Atmos Health* **7**, 459-466 (2014).
- 08 28. M. Guarneri, J. R. Balmes, Outdoor air pollution and asthma. *Lancet* **383**, 1581-1592  
09 (2014).
- 10 29. C. A. Keet, J. P. Keller, R. D. Peng, Long-Term Coarse Particulate Matter Exposure Is  
11 Associated with Asthma among Children in Medicaid. *Am J Respir Crit Care Med* **197**,  
12 737-746 (2018).
- 13 30. W. W. h. Organisation), *Microplastics in drinking-water* (World health Organisation,  
14 Geneva, 2019), vol. CC BY-NC-SA 3.0 IGO.
- 15 31. S. A. f. P. b. E. A. SAPEA, *A scientific perspective on microplastics in nature and society*  
16 (SAPEA, Berlin, 2019).
- 17 32. J. P. Ng-Blichfeldt, A. Schrik, R. K. Kortekaas, J. A. Noordhoek, I. H. Heijink, P. S.  
18 Hiemstra, J. Stolk, M. Königshoff, R. Gosens, Retinoic acid signaling balances adult distal  
19 lung epithelial progenitor cell growth and differentiation. *EBioMedicine*, (2018).
- 20 33. J. P. Ng-Blichfeldt, T. de Jong, R. K. Kortekaas, X. Wu, M. Lindner, V. Guryev, P. S.  
21 Hiemstra, J. Stolk, M. Königshoff, R. Gosens, TGF- $\beta$  activation impairs fibroblast ability



- 22 to support adult lung epithelial progenitor cell organoid formation. *Am J Physiol Lung*  
23 *Cell Mol Physiol* **317**, L14-L28 (2019).
- 24 34. M. Cole, A novel method for preparing microplastic fibers. *Scientific Reports* **6**, (2016).
- 25 35. E. Gaston, M. Woo, C. Steele, S. Sukumaran, S. Anderson, Microplastics Differ Between  
26 Indoor and Outdoor Air Masses: Insights from Multiple Microscopy Methodologies. *Appl*  
27 *Spectrosc* **74**, 1079-1098 (2020).
- 28 36. S. O'Brien, E. D. Okoffo, J. W. O'Brien, F. Ribeiro, X. Wang, S. L. Wright, S.  
29 Samanipour, C. Rauert, T. Y. A. Toapanta, R. Albarracin, K. V. Thomas, Airborne  
30 emissions of microplastic fibres from domestic laundry dryers. *Sci Total Environ* **747**,  
31 141175 (2020).
- 32 37. J. Zhang, L. Wang, K. Kannan, Microplastics in house dust from 12 countries and  
33 associated human exposure. *Environ Int* **134**, 105314 (2020).
- 34 38. Q. Zhang, Y. Zhao, F. Du, H. Cai, G. Wang, H. Shi, Microplastic Fallout in Different  
35 Indoor Environments. *Environ Sci Technol* **54**, 6530-6539 (2020).
- 36 39. B. L. Diffey, An overview analysis of the time people spend outdoors. *Br J Dermatol* **164**,  
37 848-854 (2011).
- 38 40. TIMA (Thermal Insulation Manufacturers Association), *Man-made Vitreous Fibers:*  
39 *Nomenclature, Chemical and Physical Properties* W. Eastes Ed (Nomenclature  
40 Committee of Thermal Insulation Manufacturers' Association, Refractory Ceramic Fibers  
41 Coalition (RCFC), Washington, DC, ed. 4th, 1993).
- 42 41. M. C. Basil, J. Katzen, A. E. Engler, M. Guo, M. J. Herriges, J. J. Kathiriya, R.  
43 Windmueller, A. B. Ysasi, W. J. Zacharias, H. A. Chapman, D. N. Kotton, J. R. Rock, H.  
44 W. Snoeck, G. Vunjak-Novakovic, J. A. Whitsett, E. E. Morrissey, The Cellular and  
45 Physiological Basis for Lung Repair and Regeneration: Past, Present, and Future. *Cell*  
46 *Stem Cell* **26**, 482-502 (2020).
- 47 42. B. Hogan, C. Barkauskas, H. Chapman, J. Epstein, R. Jain, C. Hsia, L. Niklason, E. Calle,  
48 A. Le, S. Randell, J. Rock, M. Snitow, M. Krummel, B. Stripp, T. Vu, E. White, J.  
49 Whitsett, E. Morrissey, Repair and regeneration of the respiratory system: complexity,  
50 plasticity, and mechanisms of lung stem cell function. *Cell Stem Cell* **15**, 123-138 (2014).
- 51 43. C. E. Barkauskas, M. I. Chung, B. Fioret, X. Gao, H. Katsura, B. L. Hogan, Lung  
52 organoids: current uses and future promise. *Development* **144**, 986-997 (2017).
- 53 44. Y. Abe, M. Mutsuga, H. Ohno, Y. Kawamura, H. Akiyama, Isolation and Quantification  
54 of Polyamide Cyclic Oligomers in Kitchen Utensils and Their Migration into Various  
55 Food Simulants. *PLoS One* **11**, e0159547 (2016).
- 56 45. S. T. L. Sait, L. Sørensen, S. Kubowicz, K. Vike-Jonas, S. V. Gonzalez, A. G.  
57 Asimakopoulos, A. M. Booth, Microplastic fibres from synthetic textiles: Environmental  
58 degradation and additive chemical content. *Environ Pollut* **268**, 115745 (2021).
- 59 46. L. Sørensen, A. S. Groven, I. A. Hovsbakken, O. Del Puerto, D. F. Krause, A. Sarno, A.  
60 M. Booth, UV degradation of natural and synthetic microfibers causes fragmentation and  
61 release of polymer degradation products and chemical additives. *Sci Total Environ* **755**,  
62 143170 (2021).
- 63 47. Y. Zhou, B. Zhou, L. Pache, M. Chang, A. H. Khodabakhshi, O. Tanaseichuk, C. Benner,  
64 S. K. Chanda, Metascape provides a biologist-oriented resource for the analysis of  
65 systems-level datasets. *Nat Commun* **10**, 1523 (2019).
- 66 48. C. Di Sano, C. D'Anna, M. Ferraro, G. Chiappara, C. Sangiorgi, S. Di Vincenzo, A.  
67 Bertani, P. Vitulo, A. Bruno, P. Dino, E. Pace, Impaired activation of Notch-1 signaling  
68 hinders repair processes of bronchial epithelial cells exposed to cigarette smoke. *Toxicol*  
69 *Lett* **326**, 61-69 (2020).
- 70 49. Y. Xing, A. Li, Z. Borok, C. Li, P. Minoo, NOTCH1 is required for regeneration of Clara  
71 cells during repair of airway injury. *Stem Cells* **30**, 946-955 (2012).

- 72 50. D. Lafkas, A. Shelton, C. Chiu, G. de Leon Boenig, Y. Chen, S. S. Stawicki, C. Siltanen,  
73 M. Reichelt, M. Zhou, X. Wu, J. Eastham-Anderson, H. Moore, M. Roose-Girma, Y.  
74 Chinn, J. Q. Hang, S. Warming, J. Egen, W. P. Lee, C. Austin, Y. Wu, J. Payandeh, J. B.  
75 Lowe, C. W. Siebel, Therapeutic antibodies reveal Notch control of transdifferentiation in  
76 the adult lung. *Nature* **528**, 127-131 (2015).
- 77 51. A. Sountoulidis, A. Stavropoulos, S. Giaglis, E. Apostolou, R. Monteiro, S. M. Chuva de  
78 Sousa Lopes, H. Chen, B. R. Stripp, C. Mummery, E. Andreakos, P. Sideras, Activation of  
79 the canonical bone morphogenetic protein (BMP) pathway during lung morphogenesis  
80 and adult lung tissue repair. *PLoS One* **7**, e41460 (2012).
- 81 52. C. Dean, M. Ito, H. P. Makarenkova, S. C. Faber, R. A. Lang, Bmp7 regulates branching  
82 morphogenesis of the lacrimal gland by promoting mesenchymal proliferation and  
83 condensation. *Development* **131**, 4155-4165 (2004).
- 84 53. Q. Tan, X. Y. Ma, W. Liu, J. A. Meridew, D. L. Jones, A. J. Haak, D. Sicard, G. Ligresti,  
85 D. J. Tschumperlin, Nascent Lung Organoids Reveal Epithelium- and Bone  
86 Morphogenetic Protein-mediated Suppression of Fibroblast Activation. *Am J Respir Cell*  
87 *Mol Biol* **61**, 607-619 (2019).
- 88 54. A. Caprioli, A. Villasenor, L. A. Wylie, C. Braitsch, L. Marty-Santos, D. Barry, C. M.  
89 Karner, S. Fu, S. M. Meadows, T. J. Carroll, O. Cleaver, Wnt4 is essential to normal  
90 mammalian lung development. *Dev Biol* **406**, 222-234 (2015).
- 91 55. E. M. M. Abdelwahab, J. Rapp, D. Feller, V. Csongei, S. Pal, D. Bartis, D. R. Thickett, J.  
92 E. Pongracz, Wnt signaling regulates trans-differentiation of stem cell like type 2 alveolar  
93 epithelial cells to type 1 epithelial cells. *Respir Res* **20**, 204 (2019).
- 94 56. N. R. Genuth, M. Barna, The Discovery of Ribosome Heterogeneity and Its Implications  
95 for Gene Regulation and Organismal Life. *Mol Cell* **71**, 364-374 (2018).
- 96 57. N. Kondrashov, A. Pusic, C. R. Stumpf, K. Shimizu, A. C. Hsieh, J. Ishijima, T. Shiroishi,  
97 M. Barna, Ribosome-mediated specificity in Hox mRNA translation and vertebrate tissue  
98 patterning. *Cell* **145**, 383-397 (2011).
- 99 58. O. Boucherat, J. Chakir, L. Jeannotte, The loss of Hoxa5 function promotes Notch-  
00 dependent goblet cell metaplasia in lung airways. *Biol Open* **1**, 677-691 (2012).
- 01 59. T. Yoshimi, N. Nakamura, S. Shimada, K. Iguchi, F. Hashimoto, K. Mochitate, Y.  
02 Takahashi, T. Miura, Homeobox B3, FoxA1 and FoxA2 interactions in epithelial lung cell  
03 differentiation of the multipotent M3E3/C3 cell line. *Eur J Cell Biol* **84**, 555-566 (2005).
- 04 60. A. Vianello, R. L. Jensen, L. Liu, J. Vollertsen, Simulating human exposure to indoor  
05 airborne microplastics using a Breathing Thermal Manikin. *Sci Rep* **9**, 8670 (2019).
- 06 61. P. N. Tsao, F. Chen, K. I. Izvolsky, J. Walker, M. A. Kukuruzinska, J. Lu, W. V. Cardoso,  
07 Gamma-secretase activation of notch signaling regulates the balance of proximal and  
08 distal fates in progenitor cells of the developing lung. *J Biol Chem* **283**, 29532-29544  
09 (2008).
- 10 62. J. S. Guseh, S. A. Bores, B. Z. Stanger, Q. Zhou, W. J. Anderson, D. A. Melton, J.  
11 Rajagopal, Notch signaling promotes airway mucous metaplasia and inhibits alveolar  
12 development. *Development* **136**, 1751-1759 (2009).
- 13 63. M. Morimoto, R. Nishinakamura, Y. Saga, R. Kopan, Different assemblies of Notch  
14 receptors coordinate the distribution of the major bronchial Clara, ciliated and  
15 neuroendocrine cells. *Development* **139**, 4365-4373 (2012).
- 16 64. M. Sauler, M. Gulati, Newly recognized occupational and environmental causes of  
17 chronic terminal airways and parenchymal lung disease. *Clin Chest Med* **33**, 667-680  
18 (2012).
- 19 65. D. W. Porter, V. Castranova, V. A. Robinson, A. F. Hubbs, R. R. Mercer, J. Scabilloni, T.  
20 Goldsmith, D. Schwegler-Berry, L. Battelli, R. Washko, J. Burkhart, C. Piacitelli, M.  
21 Whitmer, W. Jones, Acute inflammatory reaction in rats after intratracheal instillation of



- 22 material collected from a nylon flocking plant. *J Toxicol Environ Health A* **57**, 25-45  
23 (1999).
- 24 66. D. B. Warheit, T. R. Webb, K. L. Reed, J. F. Hansen, G. L. Kennedy, Jr., Four-week  
25 inhalation toxicity study in rats with nylon respirable fibers: rapid lung clearance.  
26 *Toxicology* **192**, 189-210 (2003).
- 27 67. A. T. Branco, B. Lemos, High intake of dietary sugar enhances bisphenol A (BPA)  
28 disruption and reveals ribosome-mediated pathways of toxicity. *Genetics* **197**, 147-157  
29 (2014).
- 30 68. Y. Hu, J. P. Ng-Blichfeldt, C. Ota, C. Ciminieri, W. Ren, P. S. Hiemstra, J. Stolk, R.  
31 Gosens, M. Königshoff, Wnt/ $\beta$ -catenin signaling is critical for regenerative potential of  
32 distal lung epithelial progenitor cells in homeostasis and emphysema. *Stem Cells* **38**,  
33 1467-1478 (2020).
- 34 69. J. H. Lee, E. L. Rawlins, Developmental mechanisms and adult stem cells for therapeutic  
35 lung regeneration. *Dev Biol* **433**, 166-176 (2018).
- 36 70. G. Oberdörster, Toxicokinetics and effects of fibrous and nonfibrous particles. *Inhal*  
37 *Toxicol* **14**, 29-56 (2002).
- 38 71. L. Florez-Sampedro, S. Song, B. Melgert, The diversity of myeloid immune cells shaping  
39 wound repair and fibrosis in the lung. *Regeneration (Oxf)* **5**, 3-25 (2018).
- 40 72. J. Choi, J. E. Park, G. Tsagkogeorga, M. Yanagita, B. K. Koo, N. Han, J. H. Lee,  
41 Inflammatory Signals Induce AT2 Cell-Derived Damage-Associated Transient  
42 Progenitors that Mediate Alveolar Regeneration. *Cell Stem Cell* **27**, 366-382.e367 (2020).
- 43 73. R. R. Mercer, M. L. Russell, V. L. Roggli, J. D. Crapo, Cell number and distribution in  
44 human and rat airways. *Am J Respir Cell Mol Biol* **10**, 613-624 (1994).
- 45 74. A. Ragusa, A. Svelato, C. Santacroce, P. Catalano, V. Notarstefano, O. Carnevali, F. Papa,  
46 M. C. A. Rongioletti, F. Baiocco, S. Draghi, E. D'Amore, D. Rinaldo, M. Matta, E.  
47 Giorgini, Plasticenta: First evidence of microplastics in human placenta. *Environ Int* **146**,  
48 106274 (2021).
- 49 75. S. Andrew. (2010).
- 50 76. M. Martin, Cutadapt removes adapter sequences from high-throughput sequencing reads.  
51 *2011* **17**, 3 (2011).
- 52 77. M. I. Love, W. Huber, S. Anders, Moderated estimation of fold change and dispersion for  
53 RNA-seq data with DESeq2. *Genome Biol* **15**, 550 (2014).
- 54 78. D. Torre, A. Lachmann, A. Ma'ayan, BioJupies: Automated Generation of Interactive  
55 Notebooks for RNA-Seq Data Analysis in the Cloud. *Cell Syst* **7**, 556-561.e553 (2018).
- 56 79. P. Peets, I. Leito, J. Pelt, S. Vahur, Identification and classification of textile fibres using  
57 ATR-FT-IR spectroscopy with chemometric methods. *Spectrochim Acta A Mol Biomol*  
58 *Spectrosc* **173**, 175-181 (2017).
- 59
- 60

## 61 Acknowledgments

62 **General:** The authors thank Habibie (University of Groningen, Department of Molecular  
63 Pharmacology) for his help with the human organoid experiments, Imco Sibum, Paul  
64 Hagedoorn, and Anko Eissens (University of Groningen, Department of Pharmaceutical  
65 Technology and Biopharmacy) for their assistance at the scanning electron microscope,  
66 Andreas W. Ehlers (University of Amsterdam, Van 't Hoff Institute for Molecular  
67 Sciences) for his assistance with the NMR spectroscopy, and Elena Höppener (TNO,

68 Department Environmental Modeling Sensing and Analysis) for the energy dispersive X-  
69 ray and infrared spectroscopy analysis of the microfibers.

70  
71 **Funding:** ZonMW is gratefully acknowledged for their financial support with  
72 Microplastics and Health grant 458001013.

73  
74 **Author contributions:**

75 FD: Study design, collection and assembly of data, data analysis and interpretation,  
76 manuscript writing, critical reading and revision.

77 SS: Collection and assembly of data, data analysis and interpretation, critical reading and  
78 revision.

79 GE: Collection and assembly of data, data analysis and interpretation, critical reading and  
80 revision.

81 XW: Collection and assembly of data, data analysis and interpretation, critical reading and  
82 revision.

83 IB: Collection and assembly of data, critical reading and revision.

84 DB: Collection and assembly of data, data analysis and interpretation, experimental  
85 material support, critical reading and revision.

86 IK: Collection and assembly of data, data analysis and interpretation, experimental  
87 material support, critical reading and revision.

88 DS: Collection and assembly of data, data analysis and interpretation, experimental  
89 material support, critical reading and revision.

90 RW: Collection and assembly of data, data analysis and interpretation, experimental  
91 material support, critical reading and revision.

92 MC: Collection and assembly of data, data analysis and interpretation, experimental  
93 material support, critical reading and revision.

94 AS: Data analysis and interpretation, critical reading and revision.

95 RG: Data analysis and interpretation, study design, experimental material support, critical  
96 reading and revision.

97 BM: Collection and assembly of data, study design, data analysis and interpretation,  
98 financial support, manuscript writing, critical reading and revision.

99  
00 **Competing interests:** The authors declare no competing interests.

01  
02 **Data and materials availability:** All data needed to evaluate the conclusions in the paper are  
03 present in the paper and/or the Supplementary Materials. Additional data related to this  
04 paper may be requested from the authors.

## 08 **Supplementary Materials and methods**

09

### 10 **Energy dispersive X-ray spectroscopy**

11 Samples were prepared for energy dispersive X-ray (EDX) spectroscopy analysis on an  
12 aluminium sample holder using adhesive carbon coated tape. Excessive microfibers were  
13 removed using pressurized air, after which the samples were sputter coated with 10 nm of  
14 carbon. The EDX measurements were performed with a Tescan MAIA III GMH field  
15 emission scanning electron microscope (Czech Republic) equipped with a Bruker X-Flash  
16 30 mm<sup>2</sup> silicon drift energy dispersive X-ray microanalysis detector (MA, USA).

17

### 18 **Micro-Fourier transform infrared spectroscopy**

19 Micro-Fourier transform infrared spectroscopy ( $\mu$ FTIR) measurements were performed  
20 using a Thermo Nicolet iN10 micro Fourier transform infrared microscope. Spectra were  
21 recorded in the wavelength range from 4000 to 675 cm<sup>-1</sup> using a spectral resolution of 8  
22 cm<sup>-1</sup>. For the transmission measurements of the polyester reference material and the  
23 polyester and nylon environmental fibers, a small amount of the microfibers was  
24 transferred onto a diamond micro compression cell where the samples were compressed.  
25 For the reflection measurements of the nylon reference material and the polyester and  
26 nylon environmental fibers, a small portion of microfibers was suspended in water. The  
27 suspension was subsequently filtered over a gold coated 0.8  $\mu$ m polycarbonate filter (TJ  
28 Environmental, The Netherlands). A subset of approximately 100 fibers was individually  
29 measured directly on the filter using the reflection mode of the  $\mu$ -FTIR equipment.

30

### 31 **Extraction of nylon oligomers (mono-, di- and trimer)**

32 A round bottom flask containing 25.1 g cryogenically milled nylon powder (PA66, Sigma-  
33 Aldrich) and 500 ml methanol (VWR) was equipped with a reflux condenser and the  
34 suspension was stirred overnight at 50°C. Next, the suspension was cooled to  
35 approximately 30°C and filtered over a cellulose filter (VWR) to remove the remaining  
36 powder. The solvent was removed *in vacuo* using a rotary evaporator (Büchi rotavapor R-  
37 215, Switzerland). A white solid was obtained (yield 220 mg), of which the composition  
38 was determined using liquid chromatography/mass spectrometry (LC/MS) analysis.

## 39 Isolation of nylon oligomers (mono-, di- and trimer)

40 A column for silica gel chromatography ( $\varnothing$  30 mm, VWR) was charged with silica gel 60  
41 (27 g, 0.063-0.200 mm, Merck) and dichloromethane (DCM, VWR) as eluent. The crude  
42 extract containing the mixture of oligomers (200 mg) was added on top of the silica gel  
43 column and oligomers were separated on the column using DCM:methanol as eluent  
44 (DCM:MeOH gradient: 100:0  $\rightarrow$  90:10  $\rightarrow$  80:20), which resulted in complete separation  
45 of the oligomers. The collected fractions were checked for the presence of product using  
46 LC/MS. The fractions containing pure oligomer were combined, filtered over a glass filter  
47 (VWR) and subsequently the solvent was removed *in vacuo*. The obtained solids were  
48 further dried *in vacuo*, after which the pure oligomers were obtained as white solids. The  
49 structure of the oligomers was confirmed by  $^1\text{H}$  NMR spectroscopy.

## 51 Liquid chromatography/mass spectrometry

### 52 *Qualitative analysis of nylon leachate and oligomers*

53 Qualitative analysis of nylon oligomers was performed with an Agilent 1260 series high-  
54 performance liquid chromatographer (CA, USA) equipped with a 100 x 2 mm, 3  $\mu\text{m}$   
55 Gemini NX-C18 110 Å LC Column (Phenomenex, Utrecht, The Netherlands), coupled  
56 with an Agilent 6410 triple quadrupole LC/MS with electron spray ionization (ESI) in  
57 positive SCAN mode. In addition, the LC/MS analysis of the nylon leachate was  
58 performed with the Agilent 1260 liquid chromatographer coupled to an Agilent 6460 triple  
59 quadrupole LC/MS with Jetstream ESI in positive SCAN mode. A sample volume of 5  $\mu\text{l}$   
60 was injected with a column temperature of 60  $^{\circ}\text{C}$  and a flow rate of 200  $\mu\text{l min}^{-1}$ . The  
61 sample was eluted with a gradient of Milli-Q water (containing 5 mM ammonium formate  
62 with 0.0025% formic acid (both Sigma-Aldrich), eluent A) and methanol (containing 5  
63 mM ammonium formate with 0.0025% formic acid, eluent B) with a flow rate of 0.5 ml  
64  $\text{min}^{-1}$ . Eluent B was increased from 10% to 90% in 10 minutes and maintained for 3  
65 minutes. After this, eluent B was decreased to 10% in 0.1 minute and maintained for 1.9  
66 minute to complete the cycle of 15 minutes. Mass spectrometry was performed with a gas  
67 temperature of 350 $^{\circ}\text{C}$  and a flow rate of 10  $\text{l min}^{-1}$ . Stealth gas temperature (for Agilent  
68 6460) was set at 400  $^{\circ}\text{C}$  with a flow rate of 12  $\text{l min}^{-1}$ . The capillary voltage was set at  
69 4000 V.

## Direct injection of nylon leachate

An injection volume of 10  $\mu$ l diluted nylon leachate was directly injected into an Agilent 6410 triple quadrupole MS system with ESI in positive SCAN mode. The conditions were as follows: gas temperature 350 °C, flow rate 10 l min<sup>-1</sup>, mobile phase 50:50 ratio of 80:20 acetonitrile (VWR):Milli-Q water with 5 mM ammonium formate and 10:90 acetonitrile:Milli-Q water with 5 mM ammonium formate, scan range 50–1000 Da, capillary voltage 3500 V.

## <sup>1</sup>H Nuclear magnetic resonance

The chemical structure of the oligomers was confirmed by <sup>1</sup>H NMR spectroscopy (Bruker Avance 400 spectrometer). The oligomers were dissolved in ~0.5 ml CD<sub>3</sub>OD:CDCl<sub>3</sub> (1:1) (Sigma-Aldrich). The spectra were recorded at 24 °C, and internally referenced to the residual solvent resonance (CD<sub>3</sub>OD: <sup>1</sup>H  $\delta$  3.31).

Nylon monomer, yield = 77 mg. <sup>1</sup>H NMR (400.1 MHz, CD<sub>3</sub>OD/CDCl<sub>3</sub> 50:50, 297 K)  $\delta$  = 7.56 (br. m, 2H; NHCO), 3.22 (m, 4H, NHCH<sub>2</sub>), 2.19 (m, 4H, COCH<sub>2</sub>), 1.63 (m, 4H, COCH<sub>2</sub>CH<sub>2</sub>), 1.54 (m, 4H, NHCH<sub>2</sub>CH<sub>2</sub>), 1.32 (m, 4H, NH (CH<sub>2</sub>)<sub>2</sub>CH<sub>2</sub>).

Nylon dimer, yield = 74 mg. <sup>1</sup>H NMR (400.1 MHz, CD<sub>3</sub>OD/CDCl<sub>3</sub> 50:50, 297 K)  $\delta$  = 7.68 (br. m, 4H; NHCO), 3.15 (t, 8H, NHCH<sub>2</sub>), 2.18 (m, 8H, COCH<sub>2</sub>), 1.60 (m, 8H, COCH<sub>2</sub>CH<sub>2</sub>), 1.47 (m, 8H, NHCH<sub>2</sub>CH<sub>2</sub>), 1.31 (m, 8H, NH (CH<sub>2</sub>)<sub>2</sub>CH<sub>2</sub>).

Nylon trimer, yield = 16 mg. <sup>1</sup>H NMR (400.1 MHz, CD<sub>3</sub>OD/CDCl<sub>3</sub> 50:50, 297 K)  $\delta$  = 7.74 (br. m, 6H; NHCO), 3.14 (t, 12H, NHCH<sub>2</sub>), 2.18 (m, 12H, COCH<sub>2</sub>), 1.60 (m, 12H, COCH<sub>2</sub>CH<sub>2</sub>), 1.48 (m, 12H, NHCH<sub>2</sub>CH<sub>2</sub>), 1.32 (m, 12H, NH (CH<sub>2</sub>)<sub>2</sub>CH<sub>2</sub>).

95 **Supplementary tables and figures**

96

97 **Table S1.** Size characteristics of polyester and nylon reference microfibers.

|                | Microfiber size<br>Diameter x length ( $\mu\text{m}$ ) |       |
|----------------|--------------------------------------------------------|-------|
|                | Polyester                                              | Nylon |
| 25% percentile | 14x50                                                  | 11x29 |
| Median         | 15x52                                                  | 12x31 |
| 75% percentile | 15x53                                                  | 12x32 |
| Minimum        | 13x22                                                  | 9x24  |
| Maximum        | 18x64                                                  | 14x74 |

98

99



00

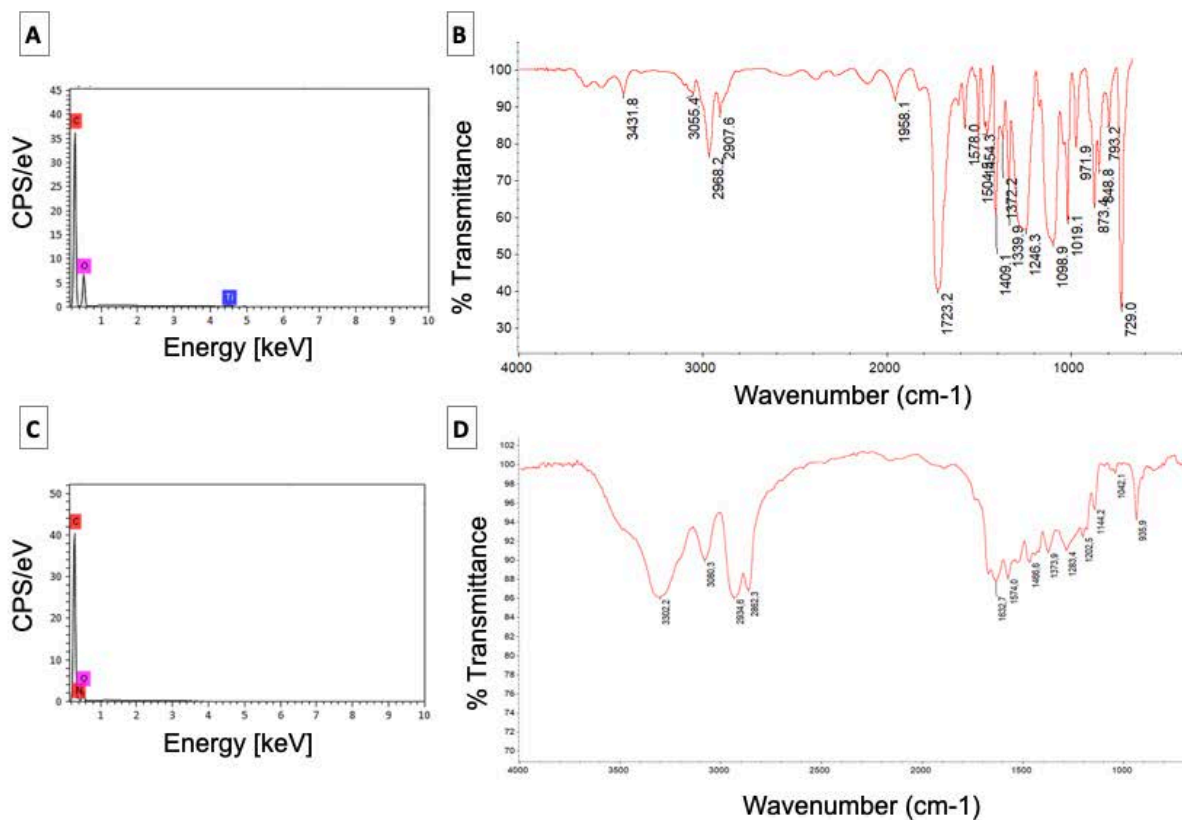

01

02 **Figure S1: Characterization of the reference microfibers using energy dispersive X-ray**  
03 **- and infrared spectroscopy.** (A) EDX spectrum of polyester, confirming the presence of  
04 carbon (C) and oxygen (O), and additionally revealing the presence of titanium (Ti),  
05 which can be ascribed to small TiO<sub>2</sub> pigment particles used as filler material in these  
06 fibers. (B) μFTIR spectrum of polyester with characteristic absorbance peaks (2968 cm<sup>-1</sup>,  
07 C-H stretch; 1723 cm<sup>-1</sup>, C=O stretch; 1246 cm<sup>-1</sup>, C-O stretch aromatic ester; 729 cm<sup>-1</sup>,  
08 benzene derivative (79)). (C) EDX spectrum of nylon, confirming the presence of carbon  
09 (C), nitrogen (N) and oxygen (O). (D) μFTIR spectrum of nylon with characteristic nylon  
10 absorbance peaks (3302 cm<sup>-1</sup>, N-H stretch; 2934 cm<sup>-1</sup>, C-H stretch; 1632 cm<sup>-1</sup>, C=O  
11 stretch sec. amide; 1202 cm<sup>-1</sup>, C-N bend (79)).

12

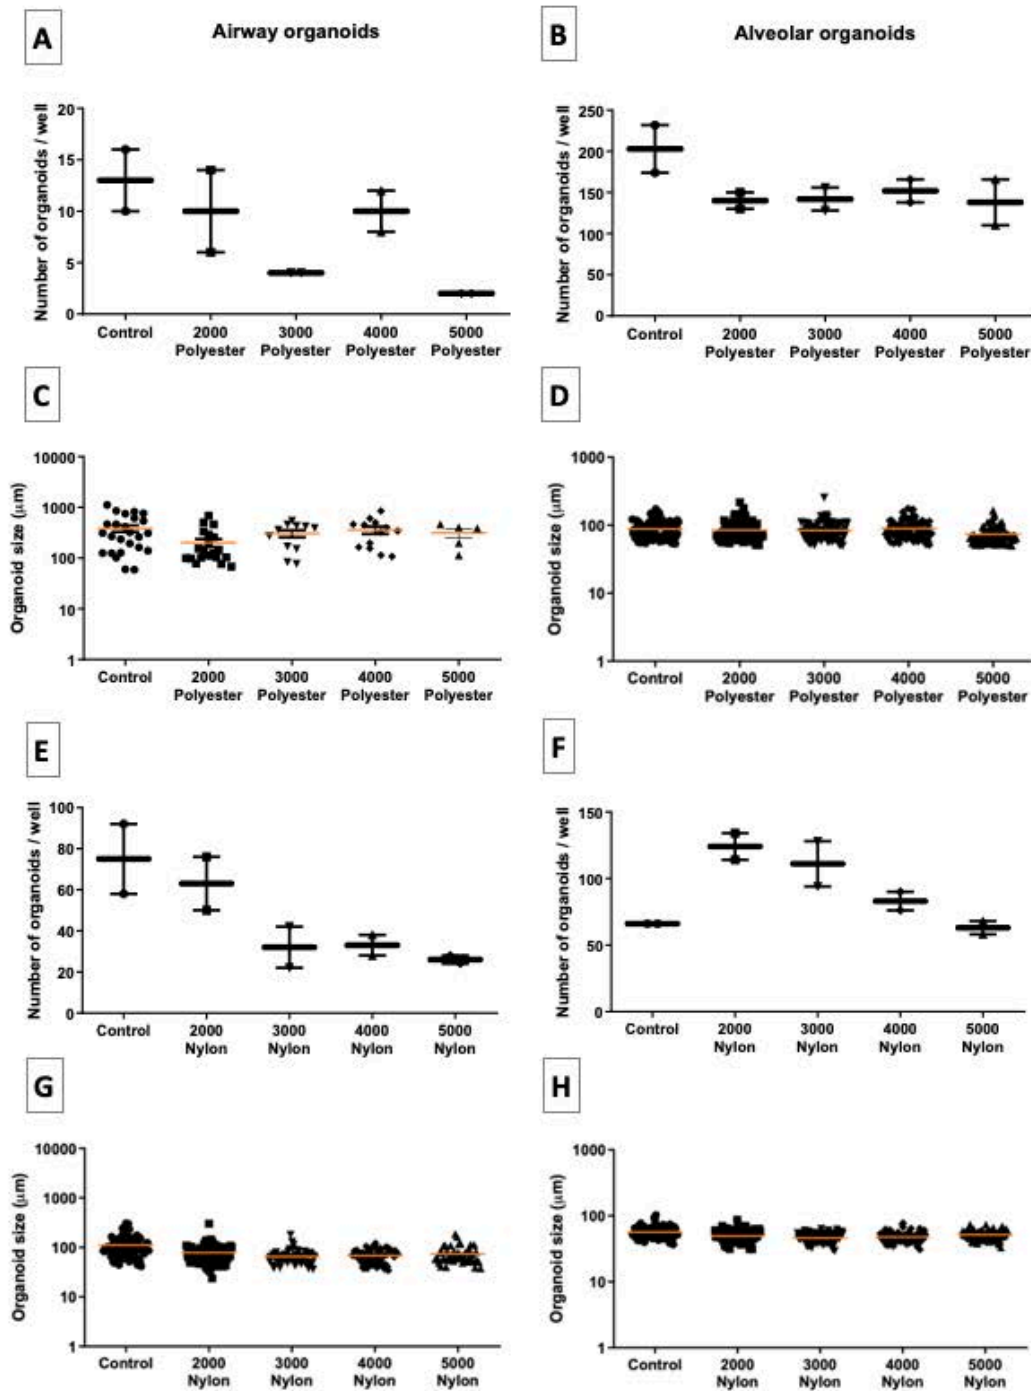

13  
14 **Figure S2: Determination of the optimal microfiber dose for subsequent in vitro testing**  
15 **of polyester and nylon reference microfibers, using 2000, 3000, 4000 and 5000**  
16 **microfibers per condition. (A, E) Quantification of airway and (B, F) alveolar organoid**  
17 **numbers for organoids exposed to polyester or nylon, respectively (n=2 independent**  
18 **isolations). (C, G) Quantification of the airway and (D, H) alveolar organoid size**  
19 **following exposure to polyester or nylon. 2000, 3000, 4000 or 5000 fibers per well**  
20 **corresponded to approximately 49, 73, 98 and 122  $\mu\text{g}/\text{ml}$  of polyester fibers or 16, 23, 31,**  
21 **and 39  $\mu\text{g}/\text{ml}$  of nylon fibers.**

22

**Table S2.** Size characteristics of polyester and nylon environmental microfibers.

|                       | <b>Microfiber size<br/>Diameter x length (µm)</b> |                            |
|-----------------------|---------------------------------------------------|----------------------------|
|                       | <b>Environmental polyester</b>                    | <b>Environmental nylon</b> |
| <b>25% percentile</b> | 15x54                                             | 46x15                      |
| <b>Median</b>         | 17x63                                             | 57x20                      |
| <b>75% percentile</b> | 18x85                                             | 73x27                      |
| <b>Minimum</b>        | 8x30                                              | 17x8                       |
| <b>Maximum</b>        | 24x269                                            | 296x66                     |

23

24

25

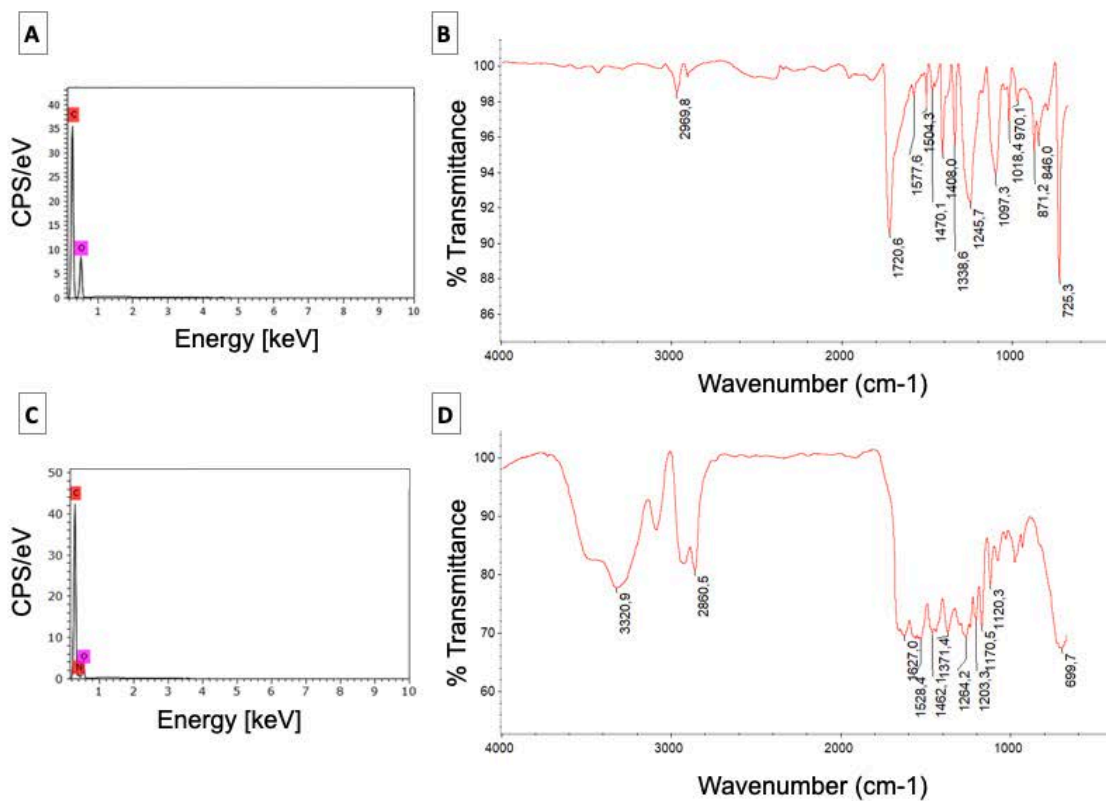

26

27

28

29

**Figure S3: Characterization of the environmental microfibers using energy dispersive X-ray - and infrared spectroscopy. EDX - and  $\mu$ -FTIR spectra of (A and B) polyester and (C and D) nylon microfibers.**

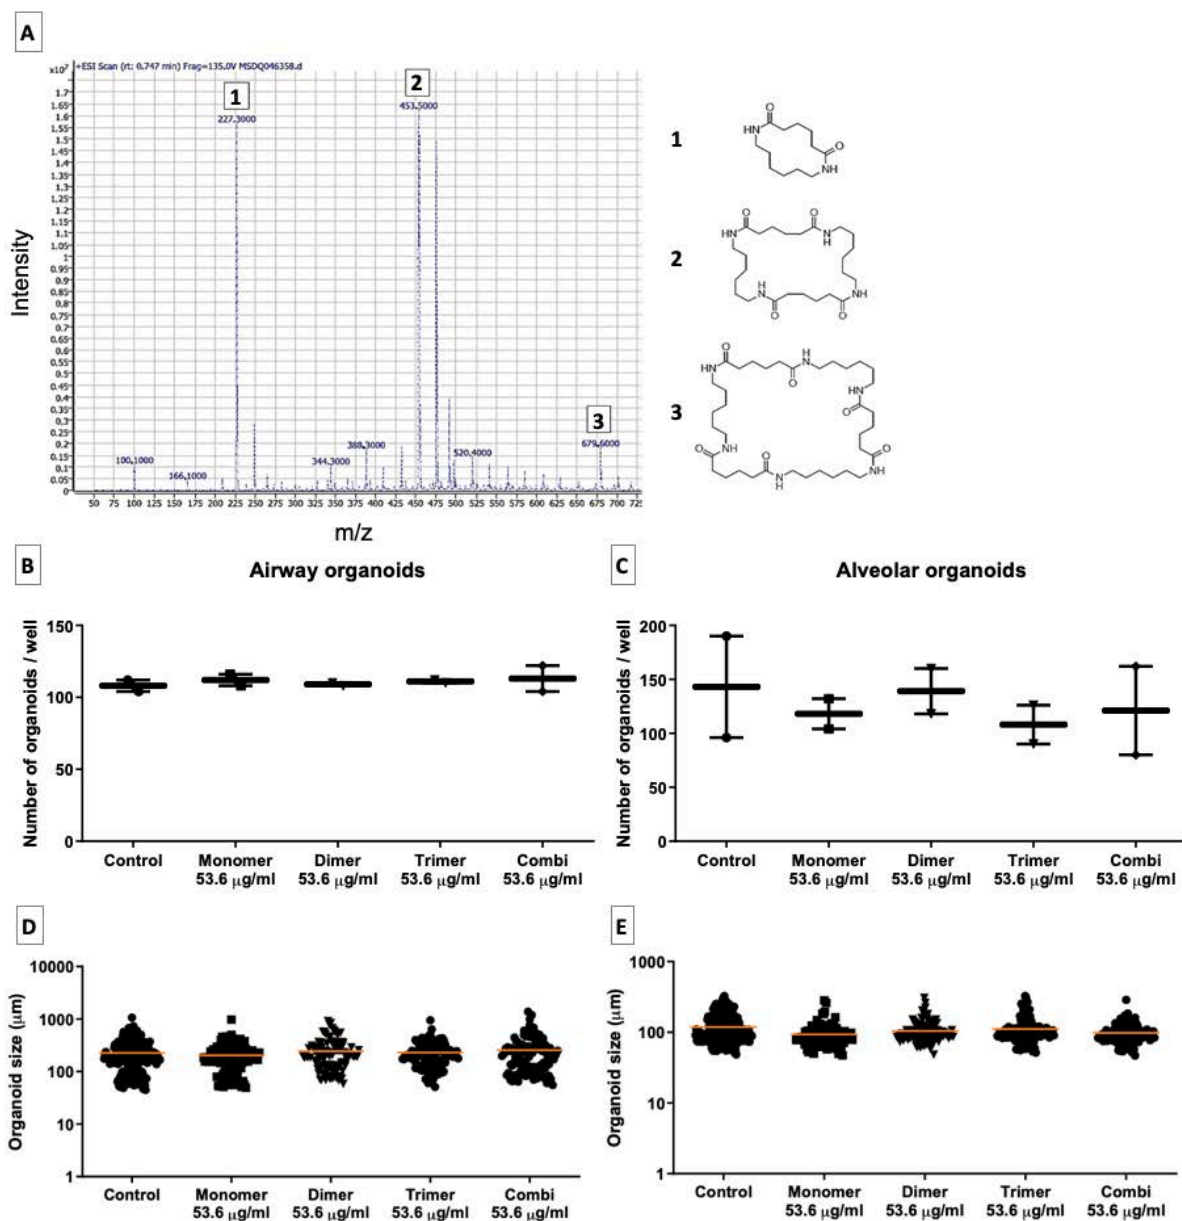

30  
31 **Figure S4: Characterization of the components leaching from nylon reference**  
32 **microfibers and their effect on organoid growth.** (A) Mass spectrometry spectrum of the  
33 nylon leachate, revealing high amounts of cyclic nylon mono-, di- and trimers, as well as  
34 other smaller peaks. (B and C) Assessment of the numbers of airway and alveolar  
35 organoids and (D and E) their sizes ( $n=2$  independent isolations).  
36  
37  
38

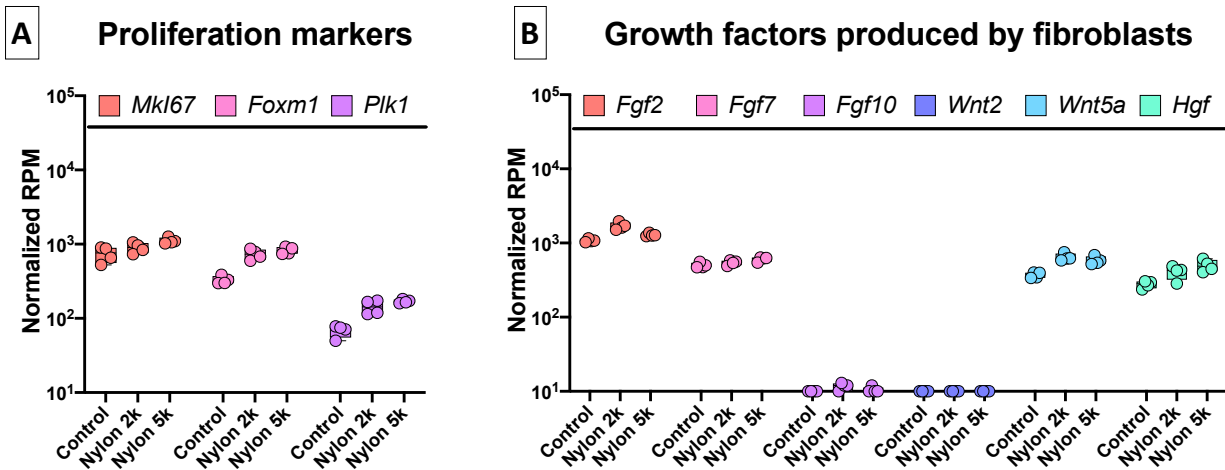

39

40

41

42

43

44

45

**Figure S5: Expression of individual genes in fibroblasts isolated from organoid cultures exposed to nylon microfibers. (A) Genes associated with proliferation of fibroblasts. (B) Genes encoding factors produced by fibroblasts important for epithelial development (n=4 independent isolations). 2k= 2000 fibers, 5k=5000 fibers**
